# Supplementary material for: High-resolution Structural and Thermodynamic Analysis of Extreme Stabilization of Human Procarboxypeptidase by Computational Protein Design
Source: PubMed Central journal article supplement (PMC3764424; doi:10.1016/j.jmb.2006.11.080), 2007-03-02
Supplement: mmc2.pdf [file mmc2.pdf]

```

REMARK  AYEdes_model: redesign of 1AYE.PDB
REMARK  RosettaDesign model for redesigned procarboxypeptidase A
ATOM    1  N   LYS    1    12.548 -15.304  3.221  1.00  0.00
ATOM    2  CA  LYS    1    13.304 -14.095  3.578  1.00  0.00
ATOM    3  C   LYS    1    14.451 -14.452  4.511  1.00  0.00
ATOM    4  O   LYS    1    14.290 -15.250  5.446  1.00  0.00
ATOM    5  CB  LYS    1    12.383 -13.059  4.225  1.00  0.00
ATOM    6  CG  LYS    1    11.280 -12.541  3.312  1.00  0.00
ATOM    7  CD  LYS    1    10.418 -11.505  4.019  1.00  0.00
ATOM    8  CE  LYS    1     9.318 -10.983  3.106  1.00  0.00
ATOM    9  NZ  LYS    1     8.452  -9.986  3.791  1.00  0.00
ATOM   10  H   LYS    1    12.034 -16.126  2.978  1.00  0.00
ATOM   11 1HZ  LYS    1     7.737  -9.666  3.153  1.00  0.00
ATOM   12 2HZ  LYS    1     8.018 -10.414  4.597  1.00  0.00
ATOM   13 3HZ  LYS    1     9.014  -9.201  4.089  1.00  0.00
ATOM   14  HA  LYS    1    13.745 -13.657  2.682  1.00  0.00
ATOM   15 1HB  LYS    1    11.937 -13.531  5.101  1.00  0.00
ATOM   16 2HB  LYS    1    13.011 -12.226  4.543  1.00  0.00
ATOM   17 1HG  LYS    1    11.742 -12.092  2.432  1.00  0.00
ATOM   18 2HG  LYS    1    10.660 -13.383  3.006  1.00  0.00
ATOM   19 1HD  LYS    1     9.971 -11.968  4.900  1.00  0.00
ATOM   20 2HD  LYS    1    11.055 -10.677  4.329  1.00  0.00
ATOM   21 1HE  LYS    1     9.785 -10.521  2.237  1.00  0.00
ATOM   22 2HE  LYS    1     8.711 -11.829  2.784  1.00  0.00
ATOM   23  N   THR    2    15.605 -13.849  4.261  1.00  0.00
ATOM   24  CA  THR    2    16.778 -14.110  5.082  1.00  0.00
ATOM   25  C   THR    2    17.286 -12.869  5.764  1.00  0.00
ATOM   26  O   THR    2    17.207 -11.778  5.208  1.00  0.00
ATOM   27  CB  THR    2    17.926 -14.714  4.252  1.00  0.00
ATOM   28  OG1 THR    2    17.498 -15.953  3.671  1.00  0.00
ATOM   29  CG2 THR    2    19.144 -14.963  5.128  1.00  0.00
ATOM   30  H   THR    2    15.671 -13.200  3.490  1.00  0.00
ATOM   31  HG1 THR    2    17.252 -16.565  4.369  1.00  0.00
ATOM   32  HA  THR    2    16.521 -14.806  5.881  1.00  0.00
ATOM   33  HB  THR    2    18.189 -14.020  3.454  1.00  0.00
ATOM   34 1HG2 THR    2    19.944 -15.389  4.524  1.00  0.00
ATOM   35 2HG2 THR    2    19.478 -14.021  5.562  1.00  0.00
ATOM   36 3HG2 THR    2    18.882 -15.657  5.925  1.00  0.00
ATOM   37  N   ILE    3    17.794 -13.032  6.980  1.00  0.00
ATOM   38  CA  ILE    3    18.331 -11.901  7.715  1.00  0.00
ATOM   39  C   ILE    3    19.841 -12.139  7.683  1.00  0.00
ATOM   40  O   ILE    3    20.331 -13.188  8.125  1.00  0.00
ATOM   41  CB  ILE    3    17.758 -11.831  9.142  1.00  0.00
ATOM   42  CG1 ILE    3    16.265 -11.492  9.102  1.00  0.00
ATOM   43  CG2 ILE    3    18.517 -10.807  9.971  1.00  0.00
ATOM   44  CD1 ILE    3    15.571 -11.632 10.437  1.00  0.00
ATOM   45  H   ILE    3    17.807 -13.952  7.398  1.00  0.00
ATOM   46  HA  ILE    3    18.119 -10.969  7.193  1.00  0.00
ATOM   47  HB  ILE    3    17.845 -12.812  9.608  1.00  0.00
ATOM   48 1HG2 ILE    3    18.098 -10.770 10.976  1.00  0.00
ATOM   49 2HG2 ILE    3    19.567 -11.090 10.026  1.00  0.00
ATOM   50 3HG2 ILE    3    18.430  -9.825  9.506  1.00  0.00
ATOM   51 1HG1 ILE    3    16.175 -10.464  8.752  1.00  0.00
ATOM   52 2HG1 ILE    3    15.800 -12.163  8.379  1.00  0.00
ATOM   53 1HD1 ILE    3    14.517 -11.376 10.329  1.00  0.00
ATOM   54 2HD1 ILE    3    15.659 -12.661 10.788  1.00  0.00
ATOM   55 3HD1 ILE    3    16.033 -10.962 11.160  1.00  0.00

```

|      |     |      |     |   |        |         |        |      |      |
|------|-----|------|-----|---|--------|---------|--------|------|------|
| ATOM | 56  | N    | PHE | 4 | 20.562 | -11.190 | 7.090  | 1.00 | 0.00 |
| ATOM | 57  | CA   | PHE | 4 | 22.013 | -11.275 | 6.971  | 1.00 | 0.00 |
| ATOM | 58  | C    | PHE | 4 | 22.732 | -10.345 | 7.921  | 1.00 | 0.00 |
| ATOM | 59  | O    | PHE | 4 | 22.249 | -9.256  | 8.226  | 1.00 | 0.00 |
| ATOM | 60  | CB   | PHE | 4 | 22.450 | -10.970 | 5.537  | 1.00 | 0.00 |
| ATOM | 61  | CG   | PHE | 4 | 21.787 | -11.836 | 4.504  | 1.00 | 0.00 |
| ATOM | 62  | CD1  | PHE | 4 | 20.556 | -11.484 | 3.970  | 1.00 | 0.00 |
| ATOM | 63  | CD2  | PHE | 4 | 22.391 | -13.004 | 4.065  | 1.00 | 0.00 |
| ATOM | 64  | CE1  | PHE | 4 | 19.945 | -12.279 | 3.020  | 1.00 | 0.00 |
| ATOM | 65  | CE2  | PHE | 4 | 21.783 | -13.800 | 3.114  | 1.00 | 0.00 |
| ATOM | 66  | CZ   | PHE | 4 | 20.558 | -13.437 | 2.591  | 1.00 | 0.00 |
| ATOM | 67  | H    | PHE | 4 | 20.088 | -10.383 | 6.709  | 1.00 | 0.00 |
| ATOM | 68  | HD1  | PHE | 4 | 20.072 | -10.567 | 4.308  | 1.00 | 0.00 |
| ATOM | 69  | HE1  | PHE | 4 | 22.269 | -14.715 | 2.776  | 1.00 | 0.00 |
| ATOM | 70  | HZ   | PHE | 4 | 20.077 | -14.066 | 1.843  | 1.00 | 0.00 |
| ATOM | 71  | HE2  | PHE | 4 | 22.269 | -14.715 | 2.776  | 1.00 | 0.00 |
| ATOM | 72  | HD2  | PHE | 4 | 23.359 | -13.290 | 4.478  | 1.00 | 0.00 |
| ATOM | 73  | HA   | PHE | 4 | 22.347 | -12.280 | 7.231  | 1.00 | 0.00 |
| ATOM | 74  | 1HB  | PHE | 4 | 22.207 | -9.939  | 5.282  | 1.00 | 0.00 |
| ATOM | 75  | 2HB  | PHE | 4 | 23.523 | -11.126 | 5.432  | 1.00 | 0.00 |
| ATOM | 76  | N    | VAL | 5 | 23.862 | -10.804 | 8.433  | 1.00 | 0.00 |
| ATOM | 77  | CA   | VAL | 5 | 24.652 | -9.993  | 9.336  | 1.00 | 0.00 |
| ATOM | 78  | C    | VAL | 5 | 25.805 | -9.563  | 8.447  | 1.00 | 0.00 |
| ATOM | 79  | O    | VAL | 5 | 26.504 | -10.397 | 7.864  | 1.00 | 0.00 |
| ATOM | 80  | CB   | VAL | 5 | 25.085 | -10.791 | 10.580 | 1.00 | 0.00 |
| ATOM | 81  | CG1  | VAL | 5 | 26.143 | -10.026 | 11.362 | 1.00 | 0.00 |
| ATOM | 82  | CG2  | VAL | 5 | 23.885 | -11.092 | 11.465 | 1.00 | 0.00 |
| ATOM | 83  | H    | VAL | 5 | 24.178 | -11.732 | 8.191  | 1.00 | 0.00 |
| ATOM | 84  | HA   | VAL | 5 | 24.100 | -9.111  | 9.663  | 1.00 | 0.00 |
| ATOM | 85  | HB   | VAL | 5 | 25.492 | -11.751 | 10.261 | 1.00 | 0.00 |
| ATOM | 86  | 1HG1 | VAL | 5 | 26.438 | -10.605 | 12.238 | 1.00 | 0.00 |
| ATOM | 87  | 2HG1 | VAL | 5 | 27.014 | -9.859  | 10.728 | 1.00 | 0.00 |
| ATOM | 88  | 3HG1 | VAL | 5 | 25.736 | -9.067  | 11.682 | 1.00 | 0.00 |
| ATOM | 89  | 1HG2 | VAL | 5 | 24.209 | -11.657 | 12.339 | 1.00 | 0.00 |
| ATOM | 90  | 2HG2 | VAL | 5 | 23.427 | -10.156 | 11.786 | 1.00 | 0.00 |
| ATOM | 91  | 3HG2 | VAL | 5 | 23.157 | -11.679 | 10.904 | 1.00 | 0.00 |
| ATOM | 92  | N    | ILE | 6 | 25.984 | -8.262  | 8.331  | 1.00 | 0.00 |
| ATOM | 93  | CA   | ILE | 6 | 27.032 | -7.710  | 7.507  | 1.00 | 0.00 |
| ATOM | 94  | C    | ILE | 6 | 28.010 | -6.961  | 8.387  | 1.00 | 0.00 |
| ATOM | 95  | O    | ILE | 6 | 27.615 | -6.359  | 9.380  | 1.00 | 0.00 |
| ATOM | 96  | CB   | ILE | 6 | 26.465 | -6.775  | 6.423  | 1.00 | 0.00 |
| ATOM | 97  | CG1  | ILE | 6 | 25.526 | -7.545  | 5.491  | 1.00 | 0.00 |
| ATOM | 98  | CG2  | ILE | 6 | 27.594 | -6.131  | 5.633  | 1.00 | 0.00 |
| ATOM | 99  | CD1  | ILE | 6 | 24.745 | -6.662  | 4.545  | 1.00 | 0.00 |
| ATOM | 100 | H    | ILE | 6 | 25.371 | -7.635  | 8.832  | 1.00 | 0.00 |
| ATOM | 101 | HA   | ILE | 6 | 27.608 | -8.505  | 7.035  | 1.00 | 0.00 |
| ATOM | 102 | HB   | ILE | 6 | 25.867 | -6.000  | 6.900  | 1.00 | 0.00 |
| ATOM | 103 | 1HG2 | ILE | 6 | 27.176 | -5.474  | 4.871  | 1.00 | 0.00 |
| ATOM | 104 | 2HG2 | ILE | 6 | 28.224 | -5.551  | 6.306  | 1.00 | 0.00 |
| ATOM | 105 | 3HG2 | ILE | 6 | 28.192 | -6.907  | 5.154  | 1.00 | 0.00 |
| ATOM | 106 | 1HG1 | ILE | 6 | 26.137 | -8.241  | 4.917  | 1.00 | 0.00 |
| ATOM | 107 | 2HG1 | ILE | 6 | 24.833 | -8.105  | 6.120  | 1.00 | 0.00 |
| ATOM | 108 | 1HD1 | ILE | 6 | 24.102 | -7.279  | 3.917  | 1.00 | 0.00 |
| ATOM | 109 | 2HD1 | ILE | 6 | 24.132 | -5.966  | 5.118  | 1.00 | 0.00 |
| ATOM | 110 | 3HD1 | ILE | 6 | 25.435 | -6.103  | 3.915  | 1.00 | 0.00 |
| ATOM | 111 | N    | VAL | 7 | 29.290 | -7.015  | 8.036  | 1.00 | 0.00 |
| ATOM | 112 | CA   | VAL | 7 | 30.317 | -6.332  | 8.807  | 1.00 | 0.00 |

|      |     |      |     |    |        |        |        |      |      |
|------|-----|------|-----|----|--------|--------|--------|------|------|
| ATOM | 113 | C    | VAL | 7  | 31.213 | -5.481 | 7.909  | 1.00 | 0.00 |
| ATOM | 114 | O    | VAL | 7  | 32.223 | -5.968 | 7.402  | 1.00 | 0.00 |
| ATOM | 115 | CB   | VAL | 7  | 31.193 | -7.329 | 9.589  | 1.00 | 0.00 |
| ATOM | 116 | CG1  | VAL | 7  | 32.239 | -6.588 | 10.410 | 1.00 | 0.00 |
| ATOM | 117 | CG2  | VAL | 7  | 30.332 | -8.202 | 10.490 | 1.00 | 0.00 |
| ATOM | 118 | H    | VAL | 7  | 29.556 | -7.542 | 7.216  | 1.00 | 0.00 |
| ATOM | 119 | HA   | VAL | 7  | 29.879 | -5.625 | 9.513  | 1.00 | 0.00 |
| ATOM | 120 | HB   | VAL | 7  | 31.690 | -7.994 | 8.882  | 1.00 | 0.00 |
| ATOM | 121 | 1HG1 | VAL | 7  | 32.850 | -7.307 | 10.956 | 1.00 | 0.00 |
| ATOM | 122 | 2HG1 | VAL | 7  | 32.875 | -6.003 | 9.746  | 1.00 | 0.00 |
| ATOM | 123 | 3HG1 | VAL | 7  | 31.743 | -5.924 | 11.117 | 1.00 | 0.00 |
| ATOM | 124 | 1HG2 | VAL | 7  | 30.966 | -8.901 | 11.034 | 1.00 | 0.00 |
| ATOM | 125 | 2HG2 | VAL | 7  | 29.793 | -7.572 | 11.198 | 1.00 | 0.00 |
| ATOM | 126 | 3HG2 | VAL | 7  | 29.618 | -8.759 | 9.883  | 1.00 | 0.00 |
| ATOM | 127 | N    | PRO | 8  | 30.822 | -4.221 | 7.650  | 1.00 | 0.00 |
| ATOM | 128 | CA   | PRO | 8  | 31.645 | -3.348 | 6.806  | 1.00 | 0.00 |
| ATOM | 129 | C    | PRO | 8  | 32.973 | -3.103 | 7.545  | 1.00 | 0.00 |
| ATOM | 130 | O    | PRO | 8  | 32.998 | -2.993 | 8.782  | 1.00 | 0.00 |
| ATOM | 131 | CB   | PRO | 8  | 30.897 | -2.048 | 6.559  | 1.00 | 0.00 |
| ATOM | 132 | CG   | PRO | 8  | 29.955 | -1.910 | 7.726  | 1.00 | 0.00 |
| ATOM | 133 | CD   | PRO | 8  | 29.555 | -3.565 | 7.980  | 1.00 | 0.00 |
| ATOM | 134 | 1HD  | PRO | 8  | 29.408 | -3.791 | 8.894  | 1.00 | 0.00 |
| ATOM | 135 | 2HD  | PRO | 8  | 28.955 | -3.922 | 7.333  | 1.00 | 0.00 |
| ATOM | 136 | 1HG  | PRO | 8  | 30.408 | -1.726 | 8.417  | 1.00 | 0.00 |
| ATOM | 137 | 2HG  | PRO | 8  | 29.146 | -1.570 | 7.396  | 1.00 | 0.00 |
| ATOM | 138 | 1HB  | PRO | 8  | 31.567 | -1.439 | 6.689  | 1.00 | 0.00 |
| ATOM | 139 | 2HB  | PRO | 8  | 30.424 | -2.257 | 5.864  | 1.00 | 0.00 |
| ATOM | 140 | HA   | PRO | 8  | 31.816 | -3.784 | 5.927  | 1.00 | 0.00 |
| ATOM | 141 | N    | THR | 9  | 34.078 | -3.059 | 6.809  | 1.00 | 0.00 |
| ATOM | 142 | CA   | THR | 9  | 35.380 | -2.841 | 7.431  | 1.00 | 0.00 |
| ATOM | 143 | C    | THR | 9  | 35.996 | -1.468 | 7.194  | 1.00 | 0.00 |
| ATOM | 144 | O    | THR | 9  | 37.013 | -1.121 | 7.796  | 1.00 | 0.00 |
| ATOM | 145 | CB   | THR | 9  | 36.414 | -3.878 | 6.956  | 1.00 | 0.00 |
| ATOM | 146 | OG1  | THR | 9  | 36.568 | -3.787 | 5.533  | 1.00 | 0.00 |
| ATOM | 147 | CG2  | THR | 9  | 35.967 | -5.285 | 7.324  | 1.00 | 0.00 |
| ATOM | 148 | H    | THR | 9  | 34.016 | -3.178 | 5.808  | 1.00 | 0.00 |
| ATOM | 149 | HG1  | THR | 9  | 37.214 | -4.436 | 5.240  | 1.00 | 0.00 |
| ATOM | 150 | HA   | THR | 9  | 35.287 | -2.912 | 8.515  | 1.00 | 0.00 |
| ATOM | 151 | HB   | THR | 9  | 37.372 | -3.666 | 7.430  | 1.00 | 0.00 |
| ATOM | 152 | 1HG2 | THR | 9  | 36.711 | -6.003 | 6.980  | 1.00 | 0.00 |
| ATOM | 153 | 2HG2 | THR | 9  | 35.860 | -5.361 | 8.406  | 1.00 | 0.00 |
| ATOM | 154 | 3HG2 | THR | 9  | 35.010 | -5.498 | 6.849  | 1.00 | 0.00 |
| ATOM | 155 | N    | ASN | 10 | 35.373 | -0.674 | 6.337  | 1.00 | 0.00 |
| ATOM | 156 | CA   | ASN | 10 | 35.882 | 0.654  | 6.051  | 1.00 | 0.00 |
| ATOM | 157 | C    | ASN | 10 | 34.763 | 1.632  | 5.702  | 1.00 | 0.00 |
| ATOM | 158 | O    | ASN | 10 | 33.600 | 1.250  | 5.545  | 1.00 | 0.00 |
| ATOM | 159 | CB   | ASN | 10 | 36.844 | 0.596  | 4.869  | 1.00 | 0.00 |
| ATOM | 160 | CG   | ASN | 10 | 36.145 | 0.089  | 3.617  | 1.00 | 0.00 |
| ATOM | 161 | OD1  | ASN | 10 | 35.266 | 0.759  | 3.077  | 1.00 | 0.00 |
| ATOM | 162 | ND2  | ASN | 10 | 36.536 | -1.101 | 3.155  | 1.00 | 0.00 |
| ATOM | 163 | H    | ASN | 10 | 34.534 | -0.997 | 5.877  | 1.00 | 0.00 |
| ATOM | 164 | 1HD2 | ASN | 10 | 36.110 | -1.482 | 2.334  | 1.00 | 0.00 |
| ATOM | 165 | 2HD2 | ASN | 10 | 37.255 | -1.609 | 3.628  | 1.00 | 0.00 |
| ATOM | 166 | HA   | ASN | 10 | 36.373 | 1.061  | 6.936  | 1.00 | 0.00 |
| ATOM | 167 | 1HB  | ASN | 10 | 37.497 | 1.439  | 4.639  | 1.00 | 0.00 |
| ATOM | 168 | 2HB  | ASN | 10 | 37.432 | -0.211 | 5.306  | 1.00 | 0.00 |
| ATOM | 169 | N    | GLU | 11 | 35.141 | 2.887  | 5.514  | 1.00 | 0.00 |

|      |     |      |     |    |        |        |        |      |      |
|------|-----|------|-----|----|--------|--------|--------|------|------|
| ATOM | 170 | CA   | GLU | 11 | 34.198 | 3.938  | 5.189  | 1.00 | 0.00 |
| ATOM | 171 | C    | GLU | 11 | 33.384 | 3.731  | 3.915  | 1.00 | 0.00 |
| ATOM | 172 | O    | GLU | 11 | 32.183 | 4.015  | 3.898  | 1.00 | 0.00 |
| ATOM | 173 | CB   | GLU | 11 | 34.917 | 5.283  | 5.063  | 1.00 | 0.00 |
| ATOM | 174 | CG   | GLU | 11 | 35.438 | 5.843  | 6.379  | 1.00 | 0.00 |
| ATOM | 175 | CD   | GLU | 11 | 36.154 | 7.149  | 6.172  | 1.00 | 0.00 |
| ATOM | 176 | OE1  | GLU | 11 | 36.265 | 7.571  | 5.046  | 1.00 | 0.00 |
| ATOM | 177 | OE2  | GLU | 11 | 36.491 | 7.780  | 7.146  | 1.00 | 0.00 |
| ATOM | 178 | H    | GLU | 11 | 36.120 | 3.120  | 5.600  | 1.00 | 0.00 |
| ATOM | 179 | HA   | GLU | 11 | 33.447 | 4.017  | 5.976  | 1.00 | 0.00 |
| ATOM | 180 | 1HB  | GLU | 11 | 35.751 | 5.135  | 4.377  | 1.00 | 0.00 |
| ATOM | 181 | 2HB  | GLU | 11 | 34.206 | 5.985  | 4.626  | 1.00 | 0.00 |
| ATOM | 182 | 1HG  | GLU | 11 | 34.662 | 5.971  | 7.133  | 1.00 | 0.00 |
| ATOM | 183 | 2HG  | GLU | 11 | 36.149 | 5.089  | 6.715  | 1.00 | 0.00 |
| ATOM | 184 | N    | GLU | 12 | 34.024 | 3.235  | 2.857  | 1.00 | 0.00 |
| ATOM | 185 | CA   | GLU | 12 | 33.330 | 3.014  | 1.591  | 1.00 | 0.00 |
| ATOM | 186 | C    | GLU | 12 | 32.258 | 1.939  | 1.650  | 1.00 | 0.00 |
| ATOM | 187 | O    | GLU | 12 | 31.179 | 2.103  | 1.081  | 1.00 | 0.00 |
| ATOM | 188 | CB   | GLU | 12 | 34.327 | 2.645  | 0.491  | 1.00 | 0.00 |
| ATOM | 189 | CG   | GLU | 12 | 35.242 | 3.784  | 0.063  | 1.00 | 0.00 |
| ATOM | 190 | CD   | GLU | 12 | 36.209 | 3.339  | -0.999 | 1.00 | 0.00 |
| ATOM | 191 | OE1  | GLU | 12 | 36.183 | 2.185  | -1.353 | 1.00 | 0.00 |
| ATOM | 192 | OE2  | GLU | 12 | 36.896 | 4.176  | -1.537 | 1.00 | 0.00 |
| ATOM | 193 | H    | GLU | 12 | 35.005 | 3.008  | 2.932  | 1.00 | 0.00 |
| ATOM | 194 | HA   | GLU | 12 | 32.804 | 3.922  | 1.294  | 1.00 | 0.00 |
| ATOM | 195 | 1HB  | GLU | 12 | 34.929 | 1.820  | 0.871  | 1.00 | 0.00 |
| ATOM | 196 | 2HB  | GLU | 12 | 33.745 | 2.306  | -0.366 | 1.00 | 0.00 |
| ATOM | 197 | 1HG  | GLU | 12 | 34.704 | 4.666  | -0.284 | 1.00 | 0.00 |
| ATOM | 198 | 2HG  | GLU | 12 | 35.789 | 4.029  | 0.972  | 1.00 | 0.00 |
| ATOM | 199 | N    | GLN | 13 | 32.533 | 0.848  | 2.352  | 1.00 | 0.00 |
| ATOM | 200 | CA   | GLN | 13 | 31.553 | -0.214 | 2.456  | 1.00 | 0.00 |
| ATOM | 201 | C    | GLN | 13 | 30.327 | 0.338  | 3.197  | 1.00 | 0.00 |
| ATOM | 202 | O    | GLN | 13 | 29.189 | 0.030  | 2.846  | 1.00 | 0.00 |
| ATOM | 203 | CB   | GLN | 13 | 32.142 | -1.391 | 3.227  | 1.00 | 0.00 |
| ATOM | 204 | CG   | GLN | 13 | 33.208 | -2.073 | 2.378  | 1.00 | 0.00 |
| ATOM | 205 | CD   | GLN | 13 | 33.641 | -3.394 | 2.999  | 1.00 | 0.00 |
| ATOM | 206 | OE1  | GLN | 13 | 33.145 | -3.778 | 4.056  | 1.00 | 0.00 |
| ATOM | 207 | NE2  | GLN | 13 | 34.570 | -4.089 | 2.339  | 1.00 | 0.00 |
| ATOM | 208 | H    | GLN | 13 | 33.426 | 0.757  | 2.814  | 1.00 | 0.00 |
| ATOM | 209 | 1HE2 | GLN | 13 | 34.892 | -4.964 | 2.702  | 1.00 | 0.00 |
| ATOM | 210 | 2HE2 | GLN | 13 | 34.944 | -3.735 | 1.482  | 1.00 | 0.00 |
| ATOM | 211 | HA   | GLN | 13 | 31.236 | -0.517 | 1.458  | 1.00 | 0.00 |
| ATOM | 212 | 1HB  | GLN | 13 | 32.552 | -0.987 | 4.153  | 1.00 | 0.00 |
| ATOM | 213 | 2HB  | GLN | 13 | 31.314 | -2.061 | 3.459  | 1.00 | 0.00 |
| ATOM | 214 | 1HG  | GLN | 13 | 33.109 | -2.205 | 1.301  | 1.00 | 0.00 |
| ATOM | 215 | 2HG  | GLN | 13 | 33.973 | -1.323 | 2.581  | 1.00 | 0.00 |
| ATOM | 216 | N    | VAL | 14 | 30.560 | 1.211  | 4.175  | 1.00 | 0.00 |
| ATOM | 217 | CA   | VAL | 14 | 29.463 | 1.803  | 4.934  | 1.00 | 0.00 |
| ATOM | 218 | C    | VAL | 14 | 28.625 | 2.690  | 4.021  | 1.00 | 0.00 |
| ATOM | 219 | O    | VAL | 14 | 27.393 | 2.647  | 4.052  | 1.00 | 0.00 |
| ATOM | 220 | CB   | VAL | 14 | 29.981 | 2.624  | 6.130  | 1.00 | 0.00 |
| ATOM | 221 | CG1  | VAL | 14 | 28.838 | 3.373  | 6.798  | 1.00 | 0.00 |
| ATOM | 222 | CG2  | VAL | 14 | 30.682 | 1.720  | 7.133  | 1.00 | 0.00 |
| ATOM | 223 | H    | VAL | 14 | 31.512 | 1.468  | 4.395  | 1.00 | 0.00 |
| ATOM | 224 | HA   | VAL | 14 | 28.781 | 1.038  | 5.307  | 1.00 | 0.00 |
| ATOM | 225 | HB   | VAL | 14 | 30.724 | 3.338  | 5.774  | 1.00 | 0.00 |
| ATOM | 226 | 1HG1 | VAL | 14 | 29.223 | 3.948  | 7.641  | 1.00 | 0.00 |

|      |     |      |     |    |        |        |        |      |      |
|------|-----|------|-----|----|--------|--------|--------|------|------|
| ATOM | 227 | 2HG1 | VAL | 14 | 28.377 | 4.049  | 6.079  | 1.00 | 0.00 |
| ATOM | 228 | 3HG1 | VAL | 14 | 28.095 | 2.660  | 7.155  | 1.00 | 0.00 |
| ATOM | 229 | 1HG2 | VAL | 14 | 31.042 | 2.316  | 7.971  | 1.00 | 0.00 |
| ATOM | 230 | 2HG2 | VAL | 14 | 29.981 | 0.969  | 7.496  | 1.00 | 0.00 |
| ATOM | 231 | 3HG2 | VAL | 14 | 31.526 | 1.226  | 6.651  | 1.00 | 0.00 |
| ATOM | 232 | N    | ALA | 15 | 29.300 | 3.507  | 3.219  | 1.00 | 0.00 |
| ATOM | 233 | CA   | ALA | 15 | 28.613 | 4.399  | 2.302  | 1.00 | 0.00 |
| ATOM | 234 | C    | ALA | 15 | 27.731 | 3.560  | 1.369  | 1.00 | 0.00 |
| ATOM | 235 | O    | ALA | 15 | 26.602 | 3.955  | 1.046  | 1.00 | 0.00 |
| ATOM | 236 | CB   | ALA | 15 | 29.618 | 5.240  | 1.528  | 1.00 | 0.00 |
| ATOM | 237 | H    | ALA | 15 | 30.310 | 3.507  | 3.248  | 1.00 | 0.00 |
| ATOM | 238 | HA   | ALA | 15 | 27.972 | 5.066  | 2.878  | 1.00 | 0.00 |
| ATOM | 239 | 1HB  | ALA | 15 | 29.087 | 5.903  | 0.845  | 1.00 | 0.00 |
| ATOM | 240 | 2HB  | ALA | 15 | 30.209 | 5.835  | 2.225  | 1.00 | 0.00 |
| ATOM | 241 | 3HB  | ALA | 15 | 30.277 | 4.586  | 0.959  | 1.00 | 0.00 |
| ATOM | 242 | N    | PHE | 16 | 28.240 | 2.390  | 0.975  | 1.00 | 0.00 |
| ATOM | 243 | CA   | PHE | 16 | 27.517 | 1.480  | 0.091  | 1.00 | 0.00 |
| ATOM | 244 | C    | PHE | 16 | 26.279 | 0.912  | 0.777  | 1.00 | 0.00 |
| ATOM | 245 | O    | PHE | 16 | 25.233 | 0.751  | 0.154  | 1.00 | 0.00 |
| ATOM | 246 | CB   | PHE | 16 | 28.431 | 0.343  | -0.370 | 1.00 | 0.00 |
| ATOM | 247 | CG   | PHE | 16 | 27.768 | -0.627 | -1.305 | 1.00 | 0.00 |
| ATOM | 248 | CD1  | PHE | 16 | 27.773 | -0.407 | -2.674 | 1.00 | 0.00 |
| ATOM | 249 | CD2  | PHE | 16 | 27.137 | -1.762 | -0.817 | 1.00 | 0.00 |
| ATOM | 250 | CE1  | PHE | 16 | 27.162 | -1.299 | -3.535 | 1.00 | 0.00 |
| ATOM | 251 | CE2  | PHE | 16 | 26.528 | -2.656 | -1.676 | 1.00 | 0.00 |
| ATOM | 252 | CZ   | PHE | 16 | 26.540 | -2.424 | -3.036 | 1.00 | 0.00 |
| ATOM | 253 | H    | PHE | 16 | 29.159 | 2.125  | 1.300  | 1.00 | 0.00 |
| ATOM | 254 | HD1  | PHE | 16 | 28.266 | 0.482  | -3.068 | 1.00 | 0.00 |
| ATOM | 255 | HE1  | PHE | 16 | 26.037 | -3.545 | -1.281 | 1.00 | 0.00 |
| ATOM | 256 | HZ   | PHE | 16 | 26.058 | -3.127 | -3.714 | 1.00 | 0.00 |
| ATOM | 257 | HE2  | PHE | 16 | 26.037 | -3.545 | -1.281 | 1.00 | 0.00 |
| ATOM | 258 | HD2  | PHE | 16 | 27.127 | -1.945 | 0.258  | 1.00 | 0.00 |
| ATOM | 259 | HA   | PHE | 16 | 27.164 | 2.021  | -0.788 | 1.00 | 0.00 |
| ATOM | 260 | 1HB  | PHE | 16 | 29.293 | 0.746  | -0.899 | 1.00 | 0.00 |
| ATOM | 261 | 2HB  | PHE | 16 | 28.771 | -0.235 | 0.488  | 1.00 | 0.00 |
| ATOM | 262 | N    | LEU | 17 | 26.398 | 0.584  | 2.057  | 1.00 | 0.00 |
| ATOM | 263 | CA   | LEU | 17 | 25.265 | 0.036  | 2.789  | 1.00 | 0.00 |
| ATOM | 264 | C    | LEU | 17 | 24.201 | 1.092  | 3.059  | 1.00 | 0.00 |
| ATOM | 265 | O    | LEU | 17 | 23.011 | 0.796  | 3.029  | 1.00 | 0.00 |
| ATOM | 266 | CB   | LEU | 17 | 25.718 | -0.586 | 4.116  | 1.00 | 0.00 |
| ATOM | 267 | CG   | LEU | 17 | 26.680 | -1.773 | 4.030  | 1.00 | 0.00 |
| ATOM | 268 | CD1  | LEU | 17 | 27.166 | -2.271 | 5.382  | 1.00 | 0.00 |
| ATOM | 269 | CD2  | LEU | 17 | 26.157 | -2.927 | 3.185  | 1.00 | 0.00 |
| ATOM | 270 | H    | LEU | 17 | 27.282 | 0.716  | 2.528  | 1.00 | 0.00 |
| ATOM | 271 | HA   | LEU | 17 | 24.782 | -0.735 | 2.190  | 1.00 | 0.00 |
| ATOM | 272 | 1HB  | LEU | 17 | 26.236 | 0.270  | 4.545  | 1.00 | 0.00 |
| ATOM | 273 | 2HB  | LEU | 17 | 24.870 | -0.852 | 4.747  | 1.00 | 0.00 |
| ATOM | 274 | HG   | LEU | 17 | 27.535 | -1.455 | 3.432  | 1.00 | 0.00 |
| ATOM | 275 | 1HD1 | LEU | 17 | 27.844 | -3.113 | 5.238  | 1.00 | 0.00 |
| ATOM | 276 | 2HD1 | LEU | 17 | 27.692 | -1.468 | 5.898  | 1.00 | 0.00 |
| ATOM | 277 | 3HD1 | LEU | 17 | 26.313 | -2.590 | 5.980  | 1.00 | 0.00 |
| ATOM | 278 | 1HD2 | LEU | 17 | 26.894 | -3.730 | 3.171  | 1.00 | 0.00 |
| ATOM | 279 | 2HD2 | LEU | 17 | 25.224 | -3.297 | 3.611  | 1.00 | 0.00 |
| ATOM | 280 | 3HD2 | LEU | 17 | 25.979 | -2.581 | 2.167  | 1.00 | 0.00 |
| ATOM | 281 | N    | GLU | 18 | 24.628 | 2.326  | 3.303  | 1.00 | 0.00 |
| ATOM | 282 | CA   | GLU | 18 | 23.697 | 3.412  | 3.567  | 1.00 | 0.00 |
| ATOM | 283 | C    | GLU | 18 | 22.850 | 3.700  | 2.320  | 1.00 | 0.00 |

|      |     |      |     |    |        |        |        |      |      |
|------|-----|------|-----|----|--------|--------|--------|------|------|
| ATOM | 284 | O    | GLU | 18 | 21.669 | 4.060  | 2.418  | 1.00 | 0.00 |
| ATOM | 285 | CB   | GLU | 18 | 24.451 | 4.669  | 4.008  | 1.00 | 0.00 |
| ATOM | 286 | CG   | GLU | 18 | 25.124 | 4.553  | 5.369  | 1.00 | 0.00 |
| ATOM | 287 | CD   | GLU | 18 | 25.864 | 5.813  | 5.721  | 1.00 | 0.00 |
| ATOM | 288 | OE1  | GLU | 18 | 25.877 | 6.716  | 4.919  | 1.00 | 0.00 |
| ATOM | 289 | OE2  | GLU | 18 | 26.322 | 5.917  | 6.834  | 1.00 | 0.00 |
| ATOM | 290 | H    | GLU | 18 | 25.620 | 2.514  | 3.305  | 1.00 | 0.00 |
| ATOM | 291 | HA   | GLU | 18 | 23.007 | 3.123  | 4.361  | 1.00 | 0.00 |
| ATOM | 292 | 1HB  | GLU | 18 | 25.205 | 4.871  | 3.247  | 1.00 | 0.00 |
| ATOM | 293 | 2HB  | GLU | 18 | 23.727 | 5.484  | 4.029  | 1.00 | 0.00 |
| ATOM | 294 | 1HG  | GLU | 18 | 24.434 | 4.301  | 6.174  | 1.00 | 0.00 |
| ATOM | 295 | 2HG  | GLU | 18 | 25.836 | 3.740  | 5.234  | 1.00 | 0.00 |
| ATOM | 296 | N    | ALA | 19 | 23.463 | 3.531  | 1.147  | 1.00 | 0.00 |
| ATOM | 297 | CA   | ALA | 19 | 22.782 | 3.755  | -0.124 | 1.00 | 0.00 |
| ATOM | 298 | C    | ALA | 19 | 21.703 | 2.696  | -0.256 | 1.00 | 0.00 |
| ATOM | 299 | O    | ALA | 19 | 20.563 | 3.015  | -0.557 | 1.00 | 0.00 |
| ATOM | 300 | CB   | ALA | 19 | 23.779 | 3.717  | -1.273 | 1.00 | 0.00 |
| ATOM | 301 | H    | ALA | 19 | 24.430 | 3.239  | 1.139  | 1.00 | 0.00 |
| ATOM | 302 | HA   | ALA | 19 | 22.315 | 4.740  | -0.101 | 1.00 | 0.00 |
| ATOM | 303 | 1HB  | ALA | 19 | 23.255 | 3.886  | -2.214 | 1.00 | 0.00 |
| ATOM | 304 | 2HB  | ALA | 19 | 24.529 | 4.495  | -1.131 | 1.00 | 0.00 |
| ATOM | 305 | 3HB  | ALA | 19 | 24.266 | 2.744  | -1.300 | 1.00 | 0.00 |
| ATOM | 306 | N    | LEU | 20 | 22.071 | 1.436  | -0.036 | 1.00 | 0.00 |
| ATOM | 307 | CA   | LEU | 20 | 21.119 | 0.333  | -0.126 | 1.00 | 0.00 |
| ATOM | 308 | C    | LEU | 20 | 19.922 | 0.620  | 0.781  | 1.00 | 0.00 |
| ATOM | 309 | O    | LEU | 20 | 18.771 | 0.497  | 0.367  | 1.00 | 0.00 |
| ATOM | 310 | CB   | LEU | 20 | 21.783 | -0.998 | 0.252  | 1.00 | 0.00 |
| ATOM | 311 | CG   | LEU | 20 | 22.897 | -1.500 | -0.671 | 1.00 | 0.00 |
| ATOM | 312 | CD1  | LEU | 20 | 23.745 | -2.607 | -0.065 | 1.00 | 0.00 |
| ATOM | 313 | CD2  | LEU | 20 | 22.413 | -1.889 | -2.061 | 1.00 | 0.00 |
| ATOM | 314 | H    | LEU | 20 | 23.033 | 1.238  | 0.199  | 1.00 | 0.00 |
| ATOM | 315 | HA   | LEU | 20 | 20.743 | 0.257  | -1.146 | 1.00 | 0.00 |
| ATOM | 316 | 1HB  | LEU | 20 | 22.208 | -0.717 | 1.214  | 1.00 | 0.00 |
| ATOM | 317 | 2HB  | LEU | 20 | 21.048 | -1.789 | 0.397  | 1.00 | 0.00 |
| ATOM | 318 | HG   | LEU | 20 | 23.531 | -0.645 | -0.908 | 1.00 | 0.00 |
| ATOM | 319 | 1HD1 | LEU | 20 | 24.512 | -2.910 | -0.778 | 1.00 | 0.00 |
| ATOM | 320 | 2HD1 | LEU | 20 | 24.221 | -2.244 | 0.846  | 1.00 | 0.00 |
| ATOM | 321 | 3HD1 | LEU | 20 | 23.112 | -3.462 | 0.171  | 1.00 | 0.00 |
| ATOM | 322 | 1HD2 | LEU | 20 | 23.259 | -2.234 | -2.657 | 1.00 | 0.00 |
| ATOM | 323 | 2HD2 | LEU | 20 | 21.676 | -2.688 | -1.980 | 1.00 | 0.00 |
| ATOM | 324 | 3HD2 | LEU | 20 | 21.958 | -1.024 | -2.544 | 1.00 | 0.00 |
| ATOM | 325 | N    | ALA | 21 | 20.210 | 1.000  | 2.023  | 1.00 | 0.00 |
| ATOM | 326 | CA   | ALA | 21 | 19.175 | 1.309  | 2.998  | 1.00 | 0.00 |
| ATOM | 327 | C    | ALA | 21 | 18.305 | 2.446  | 2.504  | 1.00 | 0.00 |
| ATOM | 328 | O    | ALA | 21 | 17.087 | 2.432  | 2.702  | 1.00 | 0.00 |
| ATOM | 329 | CB   | ALA | 21 | 19.799 | 1.648  | 4.344  | 1.00 | 0.00 |
| ATOM | 330 | H    | ALA | 21 | 21.179 | 1.077  | 2.298  | 1.00 | 0.00 |
| ATOM | 331 | HA   | ALA | 21 | 18.538 | 0.433  | 3.121  | 1.00 | 0.00 |
| ATOM | 332 | 1HB  | ALA | 21 | 19.011 | 1.876  | 5.062  | 1.00 | 0.00 |
| ATOM | 333 | 2HB  | ALA | 21 | 20.379 | 0.797  | 4.701  | 1.00 | 0.00 |
| ATOM | 334 | 3HB  | ALA | 21 | 20.451 | 2.513  | 4.235  | 1.00 | 0.00 |
| ATOM | 335 | N    | LYS | 22 | 18.928 | 3.438  | 1.873  | 1.00 | 0.00 |
| ATOM | 336 | CA   | LYS | 22 | 18.187 | 4.581  | 1.356  | 1.00 | 0.00 |
| ATOM | 337 | C    | LYS | 22 | 17.347 | 4.234  | 0.123  | 1.00 | 0.00 |
| ATOM | 338 | O    | LYS | 22 | 16.374 | 4.922  | -0.156 | 1.00 | 0.00 |
| ATOM | 339 | CB   | LYS | 22 | 19.141 | 5.726  | 1.011  | 1.00 | 0.00 |
| ATOM | 340 | CG   | LYS | 22 | 19.792 | 6.387  | 2.218  | 1.00 | 0.00 |

|      |     |      |     |    |        |        |        |      |      |
|------|-----|------|-----|----|--------|--------|--------|------|------|
| ATOM | 341 | CD   | LYS | 22 | 20.711 | 7.524  | 1.797  | 1.00 | 0.00 |
| ATOM | 342 | CE   | LYS | 22 | 21.359 | 8.189  | 3.003  | 1.00 | 0.00 |
| ATOM | 343 | NZ   | LYS | 22 | 22.280 | 9.288  | 2.604  | 1.00 | 0.00 |
| ATOM | 344 | H    | LYS | 22 | 19.930 | 3.398  | 1.751  | 1.00 | 0.00 |
| ATOM | 345 | 1HZ  | LYS | 22 | 22.688 | 9.702  | 3.431  | 1.00 | 0.00 |
| ATOM | 346 | 2HZ  | LYS | 22 | 23.013 | 8.918  | 2.016  | 1.00 | 0.00 |
| ATOM | 347 | 3HZ  | LYS | 22 | 21.763 | 9.992  | 2.096  | 1.00 | 0.00 |
| ATOM | 348 | HA   | LYS | 22 | 17.479 | 4.932  | 2.107  | 1.00 | 0.00 |
| ATOM | 349 | 1HB  | LYS | 22 | 19.914 | 5.313  | 0.363  | 1.00 | 0.00 |
| ATOM | 350 | 2HB  | LYS | 22 | 18.564 | 6.468  | 0.459  | 1.00 | 0.00 |
| ATOM | 351 | 1HG  | LYS | 22 | 19.006 | 6.775  | 2.866  | 1.00 | 0.00 |
| ATOM | 352 | 2HG  | LYS | 22 | 20.367 | 5.635  | 2.757  | 1.00 | 0.00 |
| ATOM | 353 | 1HD  | LYS | 22 | 21.486 | 7.121  | 1.144  | 1.00 | 0.00 |
| ATOM | 354 | 2HD  | LYS | 22 | 20.124 | 8.261  | 1.249  | 1.00 | 0.00 |
| ATOM | 355 | 1HE  | LYS | 22 | 20.570 | 8.589  | 3.638  | 1.00 | 0.00 |
| ATOM | 356 | 2HE  | LYS | 22 | 21.916 | 7.430  | 3.553  | 1.00 | 0.00 |
| ATOM | 357 | N    | GLN | 23 | 17.707 | 3.170  | -0.602 | 1.00 | 0.00 |
| ATOM | 358 | CA   | GLN | 23 | 16.970 | 2.745  | -1.802 | 1.00 | 0.00 |
| ATOM | 359 | C    | GLN | 23 | 15.675 | 2.035  | -1.453 | 1.00 | 0.00 |
| ATOM | 360 | O    | GLN | 23 | 15.576 | 0.808  | -1.471 | 1.00 | 0.00 |
| ATOM | 361 | CB   | GLN | 23 | 17.825 | 1.788  | -2.625 | 1.00 | 0.00 |
| ATOM | 362 | CG   | GLN | 23 | 18.938 | 2.567  | -3.318 | 1.00 | 0.00 |
| ATOM | 363 | CD   | GLN | 23 | 18.370 | 3.538  | -4.344 | 1.00 | 0.00 |
| ATOM | 364 | OE1  | GLN | 23 | 18.645 | 4.734  | -4.289 | 1.00 | 0.00 |
| ATOM | 365 | NE2  | GLN | 23 | 17.573 | 3.019  | -5.281 | 1.00 | 0.00 |
| ATOM | 366 | H    | GLN | 23 | 18.516 | 2.638  | -0.315 | 1.00 | 0.00 |
| ATOM | 367 | 1HE2 | GLN | 23 | 17.172 | 3.612  | -5.980 | 1.00 | 0.00 |
| ATOM | 368 | 2HE2 | GLN | 23 | 17.377 | 2.038  | -5.285 | 1.00 | 0.00 |
| ATOM | 369 | HA   | GLN | 23 | 16.687 | 3.621  | -2.386 | 1.00 | 0.00 |
| ATOM | 370 | 1HB  | GLN | 23 | 18.217 | 1.042  | -1.934 | 1.00 | 0.00 |
| ATOM | 371 | 2HB  | GLN | 23 | 17.158 | 1.306  | -3.340 | 1.00 | 0.00 |
| ATOM | 372 | 1HG  | GLN | 23 | 19.741 | 3.061  | -2.771 | 1.00 | 0.00 |
| ATOM | 373 | 2HG  | GLN | 23 | 19.338 | 1.698  | -3.842 | 1.00 | 0.00 |
| ATOM | 374 | N    | ASP | 24 | 14.674 | 2.844  | -1.169 | 1.00 | 0.00 |
| ATOM | 375 | CA   | ASP | 24 | 13.347 | 2.393  | -0.808 | 1.00 | 0.00 |
| ATOM | 376 | C    | ASP | 24 | 12.743 | 1.308  | -1.709 | 1.00 | 0.00 |
| ATOM | 377 | O    | ASP | 24 | 12.108 | 0.369  | -1.224 | 1.00 | 0.00 |
| ATOM | 378 | CB   | ASP | 24 | 12.369 | 3.570  | -0.783 | 1.00 | 0.00 |
| ATOM | 379 | CG   | ASP | 24 | 12.562 | 4.524  | 0.388  | 1.00 | 0.00 |
| ATOM | 380 | OD1  | ASP | 24 | 13.293 | 4.187  | 1.289  | 1.00 | 0.00 |
| ATOM | 381 | OD2  | ASP | 24 | 12.108 | 5.640  | 0.300  | 1.00 | 0.00 |
| ATOM | 382 | H    | ASP | 24 | 14.843 | 3.839  | -1.206 | 1.00 | 0.00 |
| ATOM | 383 | HA   | ASP | 24 | 13.369 | 1.937  | 0.182  | 1.00 | 0.00 |
| ATOM | 384 | 1HB  | ASP | 24 | 12.349 | 4.138  | -1.714 | 1.00 | 0.00 |
| ATOM | 385 | 2HB  | ASP | 24 | 11.427 | 3.034  | -0.663 | 1.00 | 0.00 |
| ATOM | 386 | N    | GLU | 25 | 13.010 | 1.383  | -3.009 | 1.00 | 0.00 |
| ATOM | 387 | CA   | GLU | 25 | 12.467 | 0.400  | -3.941 | 1.00 | 0.00 |
| ATOM | 388 | C    | GLU | 25 | 13.031 | -1.010 | -3.893 | 1.00 | 0.00 |
| ATOM | 389 | O    | GLU | 25 | 12.450 | -1.928 | -4.470 | 1.00 | 0.00 |
| ATOM | 390 | CB   | GLU | 25 | 12.631 | 0.882  | -5.384 | 1.00 | 0.00 |
| ATOM | 391 | CG   | GLU | 25 | 11.857 | 2.151  | -5.715 | 1.00 | 0.00 |
| ATOM | 392 | CD   | GLU | 25 | 12.088 | 2.576  | -7.138 | 1.00 | 0.00 |
| ATOM | 393 | OE1  | GLU | 25 | 12.846 | 1.926  | -7.817 | 1.00 | 0.00 |
| ATOM | 394 | OE2  | GLU | 25 | 11.422 | 3.482  | -7.582 | 1.00 | 0.00 |
| ATOM | 395 | H    | GLU | 25 | 13.596 | 2.129  | -3.356 | 1.00 | 0.00 |
| ATOM | 396 | HA   | GLU | 25 | 11.405 | 0.249  | -3.743 | 1.00 | 0.00 |
| ATOM | 397 | 1HB  | GLU | 25 | 13.696 | 1.055  | -5.543 | 1.00 | 0.00 |

|      |     |      |     |    |        |        |        |      |      |
|------|-----|------|-----|----|--------|--------|--------|------|------|
| ATOM | 398 | 2HB  | GLU | 25 | 12.294 | 0.072  | -6.031 | 1.00 | 0.00 |
| ATOM | 399 | 1HG  | GLU | 25 | 10.786 | 2.066  | -5.532 | 1.00 | 0.00 |
| ATOM | 400 | 2HG  | GLU | 25 | 12.282 | 2.893  | -5.041 | 1.00 | 0.00 |
| ATOM | 401 | N    | LEU | 26 | 14.154 | -1.186 | -3.203 | 1.00 | 0.00 |
| ATOM | 402 | CA   | LEU | 26 | 14.767 | -2.502 | -3.083 | 1.00 | 0.00 |
| ATOM | 403 | C    | LEU | 26 | 14.031 | -3.298 | -1.995 | 1.00 | 0.00 |
| ATOM | 404 | O    | LEU | 26 | 14.189 | -4.510 | -1.876 | 1.00 | 0.00 |
| ATOM | 405 | CB   | LEU | 26 | 16.263 | -2.384 | -2.763 | 1.00 | 0.00 |
| ATOM | 406 | CG   | LEU | 26 | 17.196 | -2.067 | -3.935 | 1.00 | 0.00 |
| ATOM | 407 | CD1  | LEU | 26 | 18.648 | -1.863 | -3.527 | 1.00 | 0.00 |
| ATOM | 408 | CD2  | LEU | 26 | 17.093 | -3.057 | -5.086 | 1.00 | 0.00 |
| ATOM | 409 | H    | LEU | 26 | 14.590 | -0.393 | -2.754 | 1.00 | 0.00 |
| ATOM | 410 | HA   | LEU | 26 | 14.653 | -3.045 | -4.021 | 1.00 | 0.00 |
| ATOM | 411 | 1HB  | LEU | 26 | 16.232 | -1.534 | -2.083 | 1.00 | 0.00 |
| ATOM | 412 | 2HB  | LEU | 26 | 16.633 | -3.261 | -2.232 | 1.00 | 0.00 |
| ATOM | 413 | HG   | LEU | 26 | 16.822 | -1.160 | -4.411 | 1.00 | 0.00 |
| ATOM | 414 | 1HD1 | LEU | 26 | 19.247 | -1.642 | -4.411 | 1.00 | 0.00 |
| ATOM | 415 | 2HD1 | LEU | 26 | 18.716 | -1.030 | -2.827 | 1.00 | 0.00 |
| ATOM | 416 | 3HD1 | LEU | 26 | 19.023 | -2.769 | -3.052 | 1.00 | 0.00 |
| ATOM | 417 | 1HD2 | LEU | 26 | 17.783 | -2.766 | -5.879 | 1.00 | 0.00 |
| ATOM | 418 | 2HD2 | LEU | 26 | 17.347 | -4.056 | -4.731 | 1.00 | 0.00 |
| ATOM | 419 | 3HD2 | LEU | 26 | 16.075 | -3.059 | -5.475 | 1.00 | 0.00 |
| ATOM | 420 | N    | ASN | 27 | 13.223 | -2.600 | -1.205 | 1.00 | 0.00 |
| ATOM | 421 | CA   | ASN | 27 | 12.449 | -3.223 | -0.128 | 1.00 | 0.00 |
| ATOM | 422 | C    | ASN | 27 | 13.246 | -3.994 | 0.935  | 1.00 | 0.00 |
| ATOM | 423 | O    | ASN | 27 | 12.778 | -5.021 | 1.451  | 1.00 | 0.00 |
| ATOM | 424 | CB   | ASN | 27 | 11.465 | -4.230 | -0.713 | 1.00 | 0.00 |
| ATOM | 425 | CG   | ASN | 27 | 10.383 | -3.532 | -1.523 | 1.00 | 0.00 |
| ATOM | 426 | OD1  | ASN | 27 | 9.703  | -2.640 | -1.020 | 1.00 | 0.00 |
| ATOM | 427 | ND2  | ASN | 27 | 10.223 | -3.941 | -2.784 | 1.00 | 0.00 |
| ATOM | 428 | H    | ASN | 27 | 13.139 | -1.604 | -1.352 | 1.00 | 0.00 |
| ATOM | 429 | 1HD2 | ASN | 27 | 9.526  | -3.517 | -3.362 | 1.00 | 0.00 |
| ATOM | 430 | 2HD2 | ASN | 27 | 10.800 | -4.671 | -3.150 | 1.00 | 0.00 |
| ATOM | 431 | HA   | ASN | 27 | 11.928 | -2.455 | 0.446  | 1.00 | 0.00 |
| ATOM | 432 | 1HB  | ASN | 27 | 11.820 | -5.126 | -1.223 | 1.00 | 0.00 |
| ATOM | 433 | 2HB  | ASN | 27 | 11.065 | -4.503 | 0.264  | 1.00 | 0.00 |
| ATOM | 434 | N    | PHE | 28 | 14.455 | -3.531 | 1.236  | 1.00 | 0.00 |
| ATOM | 435 | CA   | PHE | 28 | 15.275 | -4.192 | 2.245  | 1.00 | 0.00 |
| ATOM | 436 | C    | PHE | 28 | 14.734 | -3.664 | 3.584  | 1.00 | 0.00 |
| ATOM | 437 | O    | PHE | 28 | 14.174 | -2.550 | 3.646  | 1.00 | 0.00 |
| ATOM | 438 | CB   | PHE | 28 | 16.756 | -3.883 | 2.016  | 1.00 | 0.00 |
| ATOM | 439 | CG   | PHE | 28 | 17.267 | -4.326 | 0.675  | 1.00 | 0.00 |
| ATOM | 440 | CD1  | PHE | 28 | 16.536 | -5.211 | -0.104 | 1.00 | 0.00 |
| ATOM | 441 | CD2  | PHE | 28 | 18.479 | -3.859 | 0.189  | 1.00 | 0.00 |
| ATOM | 442 | CE1  | PHE | 28 | 17.006 | -5.619 | -1.338 | 1.00 | 0.00 |
| ATOM | 443 | CE2  | PHE | 28 | 18.950 | -4.265 | -1.045 | 1.00 | 0.00 |
| ATOM | 444 | CZ   | PHE | 28 | 18.212 | -5.146 | -1.809 | 1.00 | 0.00 |
| ATOM | 445 | H    | PHE | 28 | 14.810 | -2.713 | 0.761  | 1.00 | 0.00 |
| ATOM | 446 | HD1  | PHE | 28 | 15.582 | -5.585 | 0.267  | 1.00 | 0.00 |
| ATOM | 447 | HE1  | PHE | 28 | 19.904 | -3.891 | -1.415 | 1.00 | 0.00 |
| ATOM | 448 | HZ   | PHE | 28 | 18.583 | -5.468 | -2.781 | 1.00 | 0.00 |
| ATOM | 449 | HE2  | PHE | 28 | 19.904 | -3.891 | -1.415 | 1.00 | 0.00 |
| ATOM | 450 | HD2  | PHE | 28 | 19.062 | -3.163 | 0.793  | 1.00 | 0.00 |
| ATOM | 451 | HA   | PHE | 28 | 15.132 | -5.272 | 2.189  | 1.00 | 0.00 |
| ATOM | 452 | 1HB  | PHE | 28 | 16.929 | -2.809 | 2.076  | 1.00 | 0.00 |
| ATOM | 453 | 2HB  | PHE | 28 | 17.364 | -4.390 | 2.764  | 1.00 | 0.00 |
| ATOM | 454 | N    | ASP | 29 | 14.900 | -4.454 | 4.641  | 1.00 | 0.00 |



|      |     |      |     |    |        |        |        |      |      |
|------|-----|------|-----|----|--------|--------|--------|------|------|
| ATOM | 455 | CA   | ASP | 29 | 14.427 | -4.083 | 5.971  | 1.00 | 0.00 |
| ATOM | 456 | C    | ASP | 29 | 15.614 | -4.181 | 6.928  | 1.00 | 0.00 |
| ATOM | 457 | O    | ASP | 29 | 16.009 | -5.267 | 7.338  | 1.00 | 0.00 |
| ATOM | 458 | CB   | ASP | 29 | 13.269 | -4.987 | 6.400  | 1.00 | 0.00 |
| ATOM | 459 | CG   | ASP | 29 | 12.465 | -4.461 | 7.581  | 1.00 | 0.00 |
| ATOM | 460 | OD1  | ASP | 29 | 12.812 | -3.425 | 8.098  | 1.00 | 0.00 |
| ATOM | 461 | OD2  | ASP | 29 | 11.425 | -5.010 | 7.858  | 1.00 | 0.00 |
| ATOM | 462 | H    | ASP | 29 | 15.369 | -5.340 | 4.519  | 1.00 | 0.00 |
| ATOM | 463 | HA   | ASP | 29 | 14.078 | -3.050 | 5.964  | 1.00 | 0.00 |
| ATOM | 464 | 1HB  | ASP | 29 | 12.592 | -5.242 | 5.585  | 1.00 | 0.00 |
| ATOM | 465 | 2HB  | ASP | 29 | 13.823 | -5.876 | 6.705  | 1.00 | 0.00 |
| ATOM | 466 | N    | TRP | 30 | 16.230 | -3.047 | 7.231  | 1.00 | 0.00 |
| ATOM | 467 | CA   | TRP | 30 | 17.376 | -3.043 | 8.128  | 1.00 | 0.00 |
| ATOM | 468 | C    | TRP | 30 | 16.947 | -3.140 | 9.577  | 1.00 | 0.00 |
| ATOM | 469 | O    | TRP | 30 | 16.316 | -2.233 | 10.108 | 1.00 | 0.00 |
| ATOM | 470 | CB   | TRP | 30 | 18.214 | -1.781 | 7.917  | 1.00 | 0.00 |
| ATOM | 471 | CG   | TRP | 30 | 18.879 | -1.722 | 6.575  | 1.00 | 0.00 |
| ATOM | 472 | CD1  | TRP | 30 | 18.344 | -1.235 | 5.420  | 1.00 | 0.00 |
| ATOM | 473 | CD2  | TRP | 30 | 20.203 | -2.164 | 6.250  | 1.00 | 0.00 |
| ATOM | 474 | NE1  | TRP | 30 | 19.250 | -1.347 | 4.395  | 1.00 | 0.00 |
| ATOM | 475 | CE2  | TRP | 30 | 20.401 | -1.914 | 4.880  | 1.00 | 0.00 |
| ATOM | 476 | CE3  | TRP | 30 | 21.241 | -2.747 | 6.987  | 1.00 | 0.00 |
| ATOM | 477 | CZ2  | TRP | 30 | 21.586 | -2.225 | 4.232  | 1.00 | 0.00 |
| ATOM | 478 | CZ3  | TRP | 30 | 22.429 | -3.059 | 6.337  | 1.00 | 0.00 |
| ATOM | 479 | CH2  | TRP | 30 | 22.597 | -2.804 | 4.999  | 1.00 | 0.00 |
| ATOM | 480 | H    | TRP | 30 | 15.901 | -2.178 | 6.836  | 1.00 | 0.00 |
| ATOM | 481 | HE1  | TRP | 30 | 19.095 | -1.060 | 3.439  | 1.00 | 0.00 |
| ATOM | 482 | HD1  | TRP | 30 | 17.328 | -0.847 | 5.474  | 1.00 | 0.00 |
| ATOM | 483 | HZ2  | TRP | 30 | 21.676 | -2.007 | 3.167  | 1.00 | 0.00 |
| ATOM | 484 | HH2  | TRP | 30 | 23.545 | -3.064 | 4.527  | 1.00 | 0.00 |
| ATOM | 485 | HZ3  | TRP | 30 | 23.229 | -3.513 | 6.922  | 1.00 | 0.00 |
| ATOM | 486 | HE3  | TRP | 30 | 21.162 | -2.968 | 8.051  | 1.00 | 0.00 |
| ATOM | 487 | HA   | TRP | 30 | 18.002 | -3.913 | 7.932  | 1.00 | 0.00 |
| ATOM | 488 | 1HB  | TRP | 30 | 17.586 | -0.893 | 7.993  | 1.00 | 0.00 |
| ATOM | 489 | 2HB  | TRP | 30 | 19.008 | -1.729 | 8.662  | 1.00 | 0.00 |
| ATOM | 490 | N    | GLN | 31 | 17.235 | -4.280 | 10.183 | 1.00 | 0.00 |
| ATOM | 491 | CA   | GLN | 31 | 16.894 | -4.520 | 11.574 | 1.00 | 0.00 |
| ATOM | 492 | C    | GLN | 31 | 17.869 | -3.739 | 12.450 | 1.00 | 0.00 |
| ATOM | 493 | O    | GLN | 31 | 17.507 | -3.240 | 13.519 | 1.00 | 0.00 |
| ATOM | 494 | CB   | GLN | 31 | 16.997 | -6.009 | 11.885 | 1.00 | 0.00 |
| ATOM | 495 | CG   | GLN | 31 | 16.157 | -6.797 | 10.885 | 1.00 | 0.00 |
| ATOM | 496 | CD   | GLN | 31 | 14.676 | -6.483 | 11.045 | 1.00 | 0.00 |
| ATOM | 497 | OE1  | GLN | 31 | 14.124 | -6.622 | 12.135 | 1.00 | 0.00 |
| ATOM | 498 | NE2  | GLN | 31 | 14.034 | -6.061 | 9.954  | 1.00 | 0.00 |
| ATOM | 499 | H    | GLN | 31 | 17.707 | -5.006 | 9.662  | 1.00 | 0.00 |
| ATOM | 500 | 1HE2 | GLN | 31 | 13.059 | -5.840 | 10.002 | 1.00 | 0.00 |
| ATOM | 501 | 2HE2 | GLN | 31 | 14.526 | -5.964 | 9.090  | 1.00 | 0.00 |
| ATOM | 502 | HA   | GLN | 31 | 15.890 | -4.145 | 11.774 | 1.00 | 0.00 |
| ATOM | 503 | 1HB  | GLN | 31 | 18.054 | -6.270 | 11.828 | 1.00 | 0.00 |
| ATOM | 504 | 2HB  | GLN | 31 | 16.645 | -6.142 | 12.908 | 1.00 | 0.00 |
| ATOM | 505 | 1HG  | GLN | 31 | 16.395 | -6.844 | 9.823  | 1.00 | 0.00 |
| ATOM | 506 | 2HG  | GLN | 31 | 16.361 | -7.765 | 11.344 | 1.00 | 0.00 |
| ATOM | 507 | N    | ASN | 32 | 19.091 | -3.581 | 11.955 | 1.00 | 0.00 |
| ATOM | 508 | CA   | ASN | 32 | 20.145 | -2.854 | 12.656 | 1.00 | 0.00 |
| ATOM | 509 | C    | ASN | 32 | 20.937 | -2.167 | 11.534 | 1.00 | 0.00 |
| ATOM | 510 | O    | ASN | 32 | 21.612 | -2.812 | 10.728 | 1.00 | 0.00 |
| ATOM | 511 | CB   | ASN | 32 | 21.009 | -3.830 | 13.448 | 1.00 | 0.00 |

|      |     |      |     |    |        |        |        |      |      |
|------|-----|------|-----|----|--------|--------|--------|------|------|
| ATOM | 512 | CG   | ASN | 32 | 22.043 | -3.092 | 14.285 | 1.00 | 0.00 |
| ATOM | 513 | OD1  | ASN | 32 | 22.144 | -1.869 | 14.218 | 1.00 | 0.00 |
| ATOM | 514 | ND2  | ASN | 32 | 22.813 | -3.841 | 15.078 | 1.00 | 0.00 |
| ATOM | 515 | H    | ASN | 32 | 19.301 | -3.982 | 11.052 | 1.00 | 0.00 |
| ATOM | 516 | 1HD2 | ASN | 32 | 23.510 | -3.407 | 15.651 | 1.00 | 0.00 |
| ATOM | 517 | 2HD2 | ASN | 32 | 22.694 | -4.833 | 15.099 | 1.00 | 0.00 |
| ATOM | 518 | HA   | ASN | 32 | 19.703 | -2.102 | 13.311 | 1.00 | 0.00 |
| ATOM | 519 | 1HB  | ASN | 32 | 20.555 | -4.645 | 14.014 | 1.00 | 0.00 |
| ATOM | 520 | 2HB  | ASN | 32 | 21.487 | -4.231 | 12.554 | 1.00 | 0.00 |
| ATOM | 521 | N    | PRO | 33 | 20.771 | -0.858 | 11.447 | 1.00 | 0.00 |
| ATOM | 522 | CA   | PRO | 33 | 21.431 | -0.058 | 10.437 | 1.00 | 0.00 |
| ATOM | 523 | C    | PRO | 33 | 22.949 | -0.024 | 10.543 | 1.00 | 0.00 |
| ATOM | 524 | O    | PRO | 33 | 23.514 | -0.328 | 11.594 | 1.00 | 0.00 |
| ATOM | 525 | CB   | PRO | 33 | 20.925 | 1.372  | 10.528 | 1.00 | 0.00 |
| ATOM | 526 | CG   | PRO | 33 | 19.591 | 1.274  | 11.219 | 1.00 | 0.00 |
| ATOM | 527 | CD   | PRO | 33 | 19.830 | -0.046 | 12.234 | 1.00 | 0.00 |
| ATOM | 528 | 1HD  | PRO | 33 | 20.312 | 0.163  | 13.030 | 1.00 | 0.00 |
| ATOM | 529 | 2HD  | PRO | 33 | 19.070 | -0.615 | 12.312 | 1.00 | 0.00 |
| ATOM | 530 | 1HG  | PRO | 33 | 19.530 | 1.909  | 11.776 | 1.00 | 0.00 |
| ATOM | 531 | 2HG  | PRO | 33 | 18.981 | 0.917  | 10.604 | 1.00 | 0.00 |
| ATOM | 532 | 1HB  | PRO | 33 | 21.511 | 1.721  | 11.138 | 1.00 | 0.00 |
| ATOM | 533 | 2HB  | PRO | 33 | 20.775 | 1.549  | 9.694  | 1.00 | 0.00 |
| ATOM | 534 | HA   | PRO | 33 | 21.218 | -0.409 | 9.529  | 1.00 | 0.00 |
| ATOM | 535 | N    | PRO | 34 | 23.632 | 0.277  | 9.421  | 1.00 | 0.00 |
| ATOM | 536 | CA   | PRO | 34 | 25.098 | 0.349  | 9.438  | 1.00 | 0.00 |
| ATOM | 537 | C    | PRO | 34 | 25.475 | 1.604  | 10.210 | 1.00 | 0.00 |
| ATOM | 538 | O    | PRO | 34 | 24.784 | 2.620  | 10.124 | 1.00 | 0.00 |
| ATOM | 539 | CB   | PRO | 34 | 25.609 | 0.393  | 8.008  | 1.00 | 0.00 |
| ATOM | 540 | CG   | PRO | 34 | 24.472 | 0.963  | 7.202  | 1.00 | 0.00 |
| ATOM | 541 | CD   | PRO | 34 | 23.138 | 0.271  | 8.043  | 1.00 | 0.00 |
| ATOM | 542 | 1HD  | PRO | 34 | 22.366 | 0.830  | 8.070  | 1.00 | 0.00 |
| ATOM | 543 | 2HD  | PRO | 34 | 23.008 | -0.656 | 7.867  | 1.00 | 0.00 |
| ATOM | 544 | 1HG  | PRO | 34 | 24.396 | 1.785  | 7.389  | 1.00 | 0.00 |
| ATOM | 545 | 2HG  | PRO | 34 | 24.443 | 0.498  | 6.389  | 1.00 | 0.00 |
| ATOM | 546 | 1HB  | PRO | 34 | 26.240 | 1.052  | 8.073  | 1.00 | 0.00 |
| ATOM | 547 | 2HB  | PRO | 34 | 25.663 | -0.451 | 7.824  | 1.00 | 0.00 |
| ATOM | 548 | HA   | PRO | 34 | 25.475 | -0.459 | 9.881  | 1.00 | 0.00 |
| ATOM | 549 | N    | THR | 35 | 26.553 | 1.536  | 10.974 | 1.00 | 0.00 |
| ATOM | 550 | CA   | THR | 35 | 26.978 | 2.686  | 11.748 | 1.00 | 0.00 |
| ATOM | 551 | C    | THR | 35 | 28.421 | 3.103  | 11.482 | 1.00 | 0.00 |
| ATOM | 552 | O    | THR | 35 | 28.671 | 4.092  | 10.785 | 1.00 | 0.00 |
| ATOM | 553 | CB   | THR | 35 | 26.835 | 2.434  | 13.260 | 1.00 | 0.00 |
| ATOM | 554 | OG1  | THR | 35 | 27.542 | 1.239  | 13.617 | 1.00 | 0.00 |
| ATOM | 555 | CG2  | THR | 35 | 25.369 | 2.283  | 13.639 | 1.00 | 0.00 |
| ATOM | 556 | H    | THR | 35 | 27.083 | 0.678  | 11.018 | 1.00 | 0.00 |
| ATOM | 557 | HG1  | THR | 35 | 27.452 | 1.084  | 14.560 | 1.00 | 0.00 |
| ATOM | 558 | HA   | THR | 35 | 26.375 | 3.554  | 11.480 | 1.00 | 0.00 |
| ATOM | 559 | HB   | THR | 35 | 27.266 | 3.276  | 13.802 | 1.00 | 0.00 |
| ATOM | 560 | 1HG2 | THR | 35 | 25.288 | 2.106  | 14.711 | 1.00 | 0.00 |
| ATOM | 561 | 2HG2 | THR | 35 | 24.831 | 3.194  | 13.379 | 1.00 | 0.00 |
| ATOM | 562 | 3HG2 | THR | 35 | 24.939 | 1.441  | 13.098 | 1.00 | 0.00 |
| ATOM | 563 | N    | GLU | 36 | 29.364 | 2.340  | 12.028 | 1.00 | 0.00 |
| ATOM | 564 | CA   | GLU | 36 | 30.788 | 2.629  | 11.863 | 1.00 | 0.00 |
| ATOM | 565 | C    | GLU | 36 | 31.522 | 1.386  | 11.396 | 1.00 | 0.00 |
| ATOM | 566 | O    | GLU | 36 | 31.022 | 0.260  | 11.544 | 1.00 | 0.00 |
| ATOM | 567 | CB   | GLU | 36 | 31.385 | 3.149  | 13.173 | 1.00 | 0.00 |
| ATOM | 568 | CG   | GLU | 36 | 30.777 | 4.454  | 13.666 | 1.00 | 0.00 |

|      |     |      |     |    |        |        |        |      |      |
|------|-----|------|-----|----|--------|--------|--------|------|------|
| ATOM | 569 | CD   | GLU | 36 | 31.393 | 4.886  | 14.968 | 1.00 | 0.00 |
| ATOM | 570 | OE1  | GLU | 36 | 32.229 | 4.176  | 15.472 | 1.00 | 0.00 |
| ATOM | 571 | OE2  | GLU | 36 | 31.113 | 5.979  | 15.401 | 1.00 | 0.00 |
| ATOM | 572 | H    | GLU | 36 | 29.088 | 1.536  | 12.573 | 1.00 | 0.00 |
| ATOM | 573 | HA   | GLU | 36 | 30.924 | 3.389  | 11.093 | 1.00 | 0.00 |
| ATOM | 574 | 1HB  | GLU | 36 | 31.233 | 2.372  | 13.923 | 1.00 | 0.00 |
| ATOM | 575 | 2HB  | GLU | 36 | 32.453 | 3.287  | 13.004 | 1.00 | 0.00 |
| ATOM | 576 | 1HG  | GLU | 36 | 30.850 | 5.266  | 12.943 | 1.00 | 0.00 |
| ATOM | 577 | 2HG  | GLU | 36 | 29.729 | 4.204  | 13.826 | 1.00 | 0.00 |
| ATOM | 578 | N    | PRO | 37 | 32.712 | 1.573  | 10.796 | 1.00 | 0.00 |
| ATOM | 579 | CA   | PRO | 37 | 33.478 | 0.415  | 10.327 | 1.00 | 0.00 |
| ATOM | 580 | C    | PRO | 37 | 33.722 | -0.540 | 11.492 | 1.00 | 0.00 |
| ATOM | 581 | O    | PRO | 37 | 33.877 | -0.104 | 12.632 | 1.00 | 0.00 |
| ATOM | 582 | CB   | PRO | 37 | 34.797 | 0.895  | 9.746  | 1.00 | 0.00 |
| ATOM | 583 | CG   | PRO | 37 | 34.556 | 2.330  | 9.358  | 1.00 | 0.00 |
| ATOM | 584 | CD   | PRO | 37 | 33.457 | 2.811  | 10.556 | 1.00 | 0.00 |
| ATOM | 585 | 1HD  | PRO | 37 | 33.865 | 3.003  | 11.396 | 1.00 | 0.00 |
| ATOM | 586 | 2HD  | PRO | 37 | 32.784 | 3.408  | 10.243 | 1.00 | 0.00 |
| ATOM | 587 | 1HG  | PRO | 37 | 35.243 | 2.782  | 9.560  | 1.00 | 0.00 |
| ATOM | 588 | 2HG  | PRO | 37 | 34.006 | 2.328  | 8.599  | 1.00 | 0.00 |
| ATOM | 589 | 1HB  | PRO | 37 | 35.318 | 0.911  | 10.498 | 1.00 | 0.00 |
| ATOM | 590 | 2HB  | PRO | 37 | 34.837 | 0.430  | 9.017  | 1.00 | 0.00 |
| ATOM | 591 | HA   | PRO | 37 | 32.975 | -0.062 | 9.611  | 1.00 | 0.00 |
| ATOM | 592 | N    | GLY | 38 | 33.652 | -1.836 | 11.227 | 1.00 | 0.00 |
| ATOM | 593 | CA   | GLY | 38 | 33.875 | -2.805 | 12.277 | 1.00 | 0.00 |
| ATOM | 594 | C    | GLY | 38 | 32.624 | -3.235 | 13.010 | 1.00 | 0.00 |
| ATOM | 595 | O    | GLY | 38 | 32.650 | -4.259 | 13.700 | 1.00 | 0.00 |
| ATOM | 596 | H    | GLY | 38 | 33.442 | -2.148 | 10.290 | 1.00 | 0.00 |
| ATOM | 597 | 1HA  | GLY | 38 | 34.323 | -3.701 | 11.846 | 1.00 | 0.00 |
| ATOM | 598 | 2HA  | GLY | 38 | 34.554 | -2.380 | 13.015 | 1.00 | 0.00 |
| ATOM | 599 | N    | GLN | 39 | 31.531 | -2.479 | 12.867 | 1.00 | 0.00 |
| ATOM | 600 | CA   | GLN | 39 | 30.263 | -2.808 | 13.535 | 1.00 | 0.00 |
| ATOM | 601 | C    | GLN | 39 | 29.292 | -3.536 | 12.609 | 1.00 | 0.00 |
| ATOM | 602 | O    | GLN | 39 | 29.153 | -3.175 | 11.443 | 1.00 | 0.00 |
| ATOM | 603 | CB   | GLN | 39 | 29.582 | -1.531 | 14.016 | 1.00 | 0.00 |
| ATOM | 604 | CG   | GLN | 39 | 30.456 | -0.852 | 15.064 | 1.00 | 0.00 |
| ATOM | 605 | CD   | GLN | 39 | 30.574 | -1.708 | 16.318 | 1.00 | 0.00 |
| ATOM | 606 | OE1  | GLN | 39 | 29.567 | -2.086 | 16.911 | 1.00 | 0.00 |
| ATOM | 607 | NE2  | GLN | 39 | 31.811 | -2.010 | 16.720 | 1.00 | 0.00 |
| ATOM | 608 | H    | GLN | 39 | 31.577 | -1.657 | 12.282 | 1.00 | 0.00 |
| ATOM | 609 | 1HE2 | GLN | 39 | 31.946 | -2.569 | 17.539 | 1.00 | 0.00 |
| ATOM | 610 | 2HE2 | GLN | 39 | 32.600 | -1.679 | 16.204 | 1.00 | 0.00 |
| ATOM | 611 | HA   | GLN | 39 | 30.453 | -3.488 | 14.365 | 1.00 | 0.00 |
| ATOM | 612 | 1HB  | GLN | 39 | 29.433 | -0.903 | 13.137 | 1.00 | 0.00 |
| ATOM | 613 | 2HB  | GLN | 39 | 28.613 | -1.824 | 14.420 | 1.00 | 0.00 |
| ATOM | 614 | 1HG  | GLN | 39 | 31.433 | -0.429 | 14.833 | 1.00 | 0.00 |
| ATOM | 615 | 2HG  | GLN | 39 | 29.749 | -0.044 | 15.257 | 1.00 | 0.00 |
| ATOM | 616 | N    | PRO | 40 | 28.619 | -4.551 | 13.143 | 1.00 | 0.00 |
| ATOM | 617 | CA   | PRO | 40 | 27.662 | -5.329 | 12.366 | 1.00 | 0.00 |
| ATOM | 618 | C    | PRO | 40 | 26.360 | -4.587 | 12.048 | 1.00 | 0.00 |
| ATOM | 619 | O    | PRO | 40 | 25.974 | -3.645 | 12.751 | 1.00 | 0.00 |
| ATOM | 620 | CB   | PRO | 40 | 27.311 | -6.593 | 13.133 | 1.00 | 0.00 |
| ATOM | 621 | CG   | PRO | 40 | 27.552 | -6.253 | 14.581 | 1.00 | 0.00 |
| ATOM | 622 | CD   | PRO | 40 | 28.936 | -5.228 | 14.405 | 1.00 | 0.00 |
| ATOM | 623 | 1HD  | PRO | 40 | 28.980 | -4.521 | 15.043 | 1.00 | 0.00 |
| ATOM | 624 | 2HD  | PRO | 40 | 29.742 | -5.693 | 14.201 | 1.00 | 0.00 |
| ATOM | 625 | 1HG  | PRO | 40 | 26.953 | -5.710 | 14.833 | 1.00 | 0.00 |

|      |     |      |     |    |        |        |        |      |      |
|------|-----|------|-----|----|--------|--------|--------|------|------|
| ATOM | 626 | 2HG  | PRO | 40 | 27.926 | -7.009 | 14.989 | 1.00 | 0.00 |
| ATOM | 627 | 1HB  | PRO | 40 | 26.404 | -6.616 | 13.017 | 1.00 | 0.00 |
| ATOM | 628 | 2HB  | PRO | 40 | 27.946 | -7.124 | 12.879 | 1.00 | 0.00 |
| ATOM | 629 | HA   | PRO | 40 | 28.064 | -5.593 | 11.493 | 1.00 | 0.00 |
| ATOM | 630 | N    | VAL | 41 | 25.718 | -4.998 | 10.958 | 1.00 | 0.00 |
| ATOM | 631 | CA   | VAL | 41 | 24.463 | -4.422 | 10.503 | 1.00 | 0.00 |
| ATOM | 632 | C    | VAL | 41 | 23.629 | -5.655 | 10.225 | 1.00 | 0.00 |
| ATOM | 633 | O    | VAL | 41 | 24.172 | -6.707 | 9.904  | 1.00 | 0.00 |
| ATOM | 634 | CB   | VAL | 41 | 24.669 | -3.518 | 9.273  | 1.00 | 0.00 |
| ATOM | 635 | CG1  | VAL | 41 | 25.803 | -2.534 | 9.519  | 1.00 | 0.00 |
| ATOM | 636 | CG2  | VAL | 41 | 24.953 | -4.357 | 8.037  | 1.00 | 0.00 |
| ATOM | 637 | H    | VAL | 41 | 26.123 | -5.749 | 10.418 | 1.00 | 0.00 |
| ATOM | 638 | HA   | VAL | 41 | 23.987 | -3.835 | 11.290 | 1.00 | 0.00 |
| ATOM | 639 | HB   | VAL | 41 | 23.747 | -2.969 | 9.079  | 1.00 | 0.00 |
| ATOM | 640 | 1HG1 | VAL | 41 | 25.934 | -1.903 | 8.640  | 1.00 | 0.00 |
| ATOM | 641 | 2HG1 | VAL | 41 | 25.563 | -1.910 | 10.380 | 1.00 | 0.00 |
| ATOM | 642 | 3HG1 | VAL | 41 | 26.725 | -3.082 | 9.712  | 1.00 | 0.00 |
| ATOM | 643 | 1HG2 | VAL | 41 | 25.095 | -3.703 | 7.177  | 1.00 | 0.00 |
| ATOM | 644 | 2HG2 | VAL | 41 | 25.856 | -4.947 | 8.198  | 1.00 | 0.00 |
| ATOM | 645 | 3HG2 | VAL | 41 | 24.112 | -5.024 | 7.849  | 1.00 | 0.00 |
| ATOM | 646 | N    | VAL | 42 | 22.323 | -5.572 | 10.436 | 1.00 | 0.00 |
| ATOM | 647 | CA   | VAL | 42 | 21.458 | -6.721 | 10.194 | 1.00 | 0.00 |
| ATOM | 648 | C    | VAL | 42 | 20.408 | -6.257 | 9.218  | 1.00 | 0.00 |
| ATOM | 649 | O    | VAL | 42 | 19.820 | -5.190 | 9.421  | 1.00 | 0.00 |
| ATOM | 650 | CB   | VAL | 42 | 20.833 | -7.243 | 11.501 | 1.00 | 0.00 |
| ATOM | 651 | CG1  | VAL | 42 | 19.898 | -8.409 | 11.216 | 1.00 | 0.00 |
| ATOM | 652 | CG2  | VAL | 42 | 21.919 | -7.661 | 12.482 | 1.00 | 0.00 |
| ATOM | 653 | H    | VAL | 42 | 21.923 | -4.706 | 10.767 | 1.00 | 0.00 |
| ATOM | 654 | HA   | VAL | 42 | 22.005 | -7.537 | 9.720  | 1.00 | 0.00 |
| ATOM | 655 | HB   | VAL | 42 | 20.273 | -6.435 | 11.973 | 1.00 | 0.00 |
| ATOM | 656 | 1HG1 | VAL | 42 | 19.465 | -8.765 | 12.151 | 1.00 | 0.00 |
| ATOM | 657 | 2HG1 | VAL | 42 | 19.101 | -8.081 | 10.549 | 1.00 | 0.00 |
| ATOM | 658 | 3HG1 | VAL | 42 | 20.457 | -9.217 | 10.745 | 1.00 | 0.00 |
| ATOM | 659 | 1HG2 | VAL | 42 | 21.460 | -8.026 | 13.400 | 1.00 | 0.00 |
| ATOM | 660 | 2HG2 | VAL | 42 | 22.524 | -8.452 | 12.038 | 1.00 | 0.00 |
| ATOM | 661 | 3HG2 | VAL | 42 | 22.553 | -6.804 | 12.710 | 1.00 | 0.00 |
| ATOM | 662 | N    | ILE | 43 | 20.143 | -7.059 | 8.189  | 1.00 | 0.00 |
| ATOM | 663 | CA   | ILE | 43 | 19.133 | -6.692 | 7.192  | 1.00 | 0.00 |
| ATOM | 664 | C    | ILE | 43 | 18.286 | -7.852 | 6.663  | 1.00 | 0.00 |
| ATOM | 665 | O    | ILE | 43 | 18.808 | -8.931 | 6.362  | 1.00 | 0.00 |
| ATOM | 666 | CB   | ILE | 43 | 19.770 | -6.010 | 5.967  | 1.00 | 0.00 |
| ATOM | 667 | CG1  | ILE | 43 | 18.686 | -5.560 | 4.984  | 1.00 | 0.00 |
| ATOM | 668 | CG2  | ILE | 43 | 20.754 | -6.948 | 5.287  | 1.00 | 0.00 |
| ATOM | 669 | CD1  | ILE | 43 | 19.230 | -4.895 | 3.739  | 1.00 | 0.00 |
| ATOM | 670 | H    | ILE | 43 | 20.644 | -7.931 | 8.094  | 1.00 | 0.00 |
| ATOM | 671 | HA   | ILE | 43 | 18.386 | -6.030 | 7.628  | 1.00 | 0.00 |
| ATOM | 672 | HB   | ILE | 43 | 20.292 | -5.111 | 6.293  | 1.00 | 0.00 |
| ATOM | 673 | 1HG2 | ILE | 43 | 21.194 | -6.450 | 4.423  | 1.00 | 0.00 |
| ATOM | 674 | 2HG2 | ILE | 43 | 21.541 | -7.220 | 5.989  | 1.00 | 0.00 |
| ATOM | 675 | 3HG2 | ILE | 43 | 20.233 | -7.848 | 4.960  | 1.00 | 0.00 |
| ATOM | 676 | 1HG1 | ILE | 43 | 18.114 | -6.444 | 4.704  | 1.00 | 0.00 |
| ATOM | 677 | 2HG1 | ILE | 43 | 18.037 | -4.863 | 5.514  | 1.00 | 0.00 |
| ATOM | 678 | 1HD1 | ILE | 43 | 18.403 | -4.603 | 3.091  | 1.00 | 0.00 |
| ATOM | 679 | 2HD1 | ILE | 43 | 19.801 | -4.009 | 4.019  | 1.00 | 0.00 |
| ATOM | 680 | 3HD1 | ILE | 43 | 19.878 | -5.591 | 3.208  | 1.00 | 0.00 |
| ATOM | 681 | N    | LEU | 44 | 16.970 | -7.672 | 6.681  | 1.00 | 0.00 |
| ATOM | 682 | CA   | LEU | 44 | 16.063 | -8.693 | 6.180  | 1.00 | 0.00 |

|      |     |      |     |    |        |         |        |      |      |
|------|-----|------|-----|----|--------|---------|--------|------|------|
| ATOM | 683 | C    | LEU | 44 | 15.940 | -8.404  | 4.674  | 1.00 | 0.00 |
| ATOM | 684 | O    | LEU | 44 | 15.591 | -7.293  | 4.266  | 1.00 | 0.00 |
| ATOM | 685 | CB   | LEU | 44 | 14.719 | -8.644  | 6.918  | 1.00 | 0.00 |
| ATOM | 686 | CG   | LEU | 44 | 13.578 | -9.480  | 6.333  | 1.00 | 0.00 |
| ATOM | 687 | CD1  | LEU | 44 | 13.848 | -10.977 | 6.339  | 1.00 | 0.00 |
| ATOM | 688 | CD2  | LEU | 44 | 12.217 | -9.173  | 6.941  | 1.00 | 0.00 |
| ATOM | 689 | H    | LEU | 44 | 16.592 | -6.811  | 7.049  | 1.00 | 0.00 |
| ATOM | 690 | HA   | LEU | 44 | 16.505 | -9.678  | 6.327  | 1.00 | 0.00 |
| ATOM | 691 | 1HB  | LEU | 44 | 15.026 | -9.067  | 7.873  | 1.00 | 0.00 |
| ATOM | 692 | 2HB  | LEU | 44 | 14.378 | -7.620  | 7.067  | 1.00 | 0.00 |
| ATOM | 693 | HG   | LEU | 44 | 13.422 | -9.143  | 5.308  | 1.00 | 0.00 |
| ATOM | 694 | 1HD1 | LEU | 44 | 12.995 | -11.503 | 5.909  | 1.00 | 0.00 |
| ATOM | 695 | 2HD1 | LEU | 44 | 14.739 | -11.188 | 5.747  | 1.00 | 0.00 |
| ATOM | 696 | 3HD1 | LEU | 44 | 14.003 | -11.314 | 7.363  | 1.00 | 0.00 |
| ATOM | 697 | 1HD2 | LEU | 44 | 11.460 | -9.805  | 6.475  | 1.00 | 0.00 |
| ATOM | 698 | 2HD2 | LEU | 44 | 12.244 | -9.369  | 8.013  | 1.00 | 0.00 |
| ATOM | 699 | 3HD2 | LEU | 44 | 11.970 | -8.125  | 6.770  | 1.00 | 0.00 |
| ATOM | 700 | N    | ILE | 45 | 16.249 | -9.404  | 3.860  | 1.00 | 0.00 |
| ATOM | 701 | CA   | ILE | 45 | 16.181 | -9.284  | 2.403  | 1.00 | 0.00 |
| ATOM | 702 | C    | ILE | 45 | 15.045 | -10.159 | 1.885  | 1.00 | 0.00 |
| ATOM | 703 | O    | ILE | 45 | 15.035 | -11.376 | 2.115  | 1.00 | 0.00 |
| ATOM | 704 | CB   | ILE | 45 | 17.511 | -9.687  | 1.740  | 1.00 | 0.00 |
| ATOM | 705 | CG1  | ILE | 45 | 18.649 | -8.794  | 2.240  | 1.00 | 0.00 |
| ATOM | 706 | CG2  | ILE | 45 | 17.395 | -9.610  | 0.226  | 1.00 | 0.00 |
| ATOM | 707 | CD1  | ILE | 45 | 18.567 | -7.367  | 1.748  | 1.00 | 0.00 |
| ATOM | 708 | H    | ILE | 45 | 16.543 | -10.283 | 4.261  | 1.00 | 0.00 |
| ATOM | 709 | HA   | ILE | 45 | 15.926 | -8.265  | 2.113  | 1.00 | 0.00 |
| ATOM | 710 | HB   | ILE | 45 | 17.760 | -10.706 | 2.034  | 1.00 | 0.00 |
| ATOM | 711 | 1HG2 | ILE | 45 | 18.344 | -9.897  | -0.227 | 1.00 | 0.00 |
| ATOM | 712 | 2HG2 | ILE | 45 | 16.612 | -10.286 | -0.114 | 1.00 | 0.00 |
| ATOM | 713 | 3HG2 | ILE | 45 | 17.147 | -8.590  | -0.069 | 1.00 | 0.00 |
| ATOM | 714 | 1HG1 | ILE | 45 | 18.616 | -8.805  | 3.329  | 1.00 | 0.00 |
| ATOM | 715 | 2HG1 | ILE | 45 | 19.584 | -9.241  | 1.902  | 1.00 | 0.00 |
| ATOM | 716 | 1HD1 | ILE | 45 | 19.407 | -6.796  | 2.144  | 1.00 | 0.00 |
| ATOM | 717 | 2HD1 | ILE | 45 | 18.602 | -7.354  | 0.658  | 1.00 | 0.00 |
| ATOM | 718 | 3HD1 | ILE | 45 | 17.634 | -6.918  | 2.086  | 1.00 | 0.00 |
| ATOM | 719 | N    | PRO | 46 | 14.072 | -9.559  | 1.180  | 1.00 | 0.00 |
| ATOM | 720 | CA   | PRO | 46 | 12.949 | -10.344 | 0.650  | 1.00 | 0.00 |
| ATOM | 721 | C    | PRO | 46 | 13.474 | -11.491 | -0.209 | 1.00 | 0.00 |
| ATOM | 722 | O    | PRO | 46 | 14.459 | -11.325 | -0.931 | 1.00 | 0.00 |
| ATOM | 723 | CB   | PRO | 46 | 12.054 | -9.435  | -0.175 | 1.00 | 0.00 |
| ATOM | 724 | CG   | PRO | 46 | 12.326 | -8.045  | 0.338  | 1.00 | 0.00 |
| ATOM | 725 | CD   | PRO | 46 | 13.967 | -8.165  | 0.747  | 1.00 | 0.00 |
| ATOM | 726 | 1HD  | PRO | 46 | 14.553 | -8.110  | -0.003 | 1.00 | 0.00 |
| ATOM | 727 | 2HD  | PRO | 46 | 14.204 | -7.679  | 1.531  | 1.00 | 0.00 |
| ATOM | 728 | 1HG  | PRO | 46 | 12.349 | -7.515  | -0.322 | 1.00 | 0.00 |
| ATOM | 729 | 2HG  | PRO | 46 | 11.933 | -7.976  | 1.186  | 1.00 | 0.00 |
| ATOM | 730 | 1HB  | PRO | 46 | 12.458 | -9.496  | -0.993 | 1.00 | 0.00 |
| ATOM | 731 | 2HB  | PRO | 46 | 11.271 | -9.670  | 0.109  | 1.00 | 0.00 |
| ATOM | 732 | HA   | PRO | 46 | 12.410 | -10.720 | 1.399  | 1.00 | 0.00 |
| ATOM | 733 | N    | SER | 47 | 12.804 | -12.639 | -0.141 | 1.00 | 0.00 |
| ATOM | 734 | CA   | SER | 47 | 13.188 | -13.824 | -0.900 | 1.00 | 0.00 |
| ATOM | 735 | C    | SER | 47 | 13.625 | -13.556 | -2.341 | 1.00 | 0.00 |
| ATOM | 736 | O    | SER | 47 | 14.685 | -13.992 | -2.778 | 1.00 | 0.00 |
| ATOM | 737 | CB   | SER | 47 | 11.901 | -14.653 | -0.918 | 1.00 | 0.00 |
| ATOM | 738 | OG   | SER | 47 | 10.850 | -13.949 | -1.555 | 1.00 | 0.00 |
| ATOM | 739 | H    | SER | 47 | 11.995 | -12.692 | 0.462  | 1.00 | 0.00 |

|      |     |      |     |    |        |         |        |      |      |
|------|-----|------|-----|----|--------|---------|--------|------|------|
| ATOM | 740 | HG   | SER | 47 | 10.056 | -14.489 | -1.553 | 1.00 | 0.00 |
| ATOM | 741 | HA   | SER | 47 | 13.974 | -14.409 | -0.421 | 1.00 | 0.00 |
| ATOM | 742 | 1HB  | SER | 47 | 12.093 | -15.582 | -1.454 | 1.00 | 0.00 |
| ATOM | 743 | 2HB  | SER | 47 | 11.617 | -14.879 | 0.109  | 1.00 | 0.00 |
| ATOM | 744 | N    | ASP | 48 | 12.772 | -12.872 | -3.082 | 1.00 | 0.00 |
| ATOM | 745 | CA   | ASP | 48 | 13.054 | -12.546 | -4.467 | 1.00 | 0.00 |
| ATOM | 746 | C    | ASP | 48 | 14.384 | -11.815 | -4.713 | 1.00 | 0.00 |
| ATOM | 747 | O    | ASP | 48 | 15.036 | -12.058 | -5.731 | 1.00 | 0.00 |
| ATOM | 748 | CB   | ASP | 48 | 11.932 | -11.687 | -5.055 | 1.00 | 0.00 |
| ATOM | 749 | CG   | ASP | 48 | 10.625 | -12.433 | -5.287 | 1.00 | 0.00 |
| ATOM | 750 | OD1  | ASP | 48 | 10.618 | -13.634 | -5.161 | 1.00 | 0.00 |
| ATOM | 751 | OD2  | ASP | 48 | 9.614  | -11.787 | -5.432 | 1.00 | 0.00 |
| ATOM | 752 | H    | ASP | 48 | 11.900 | -12.568 | -2.673 | 1.00 | 0.00 |
| ATOM | 753 | HA   | ASP | 48 | 13.135 | -13.462 | -5.053 | 1.00 | 0.00 |
| ATOM | 754 | 1HB  | ASP | 48 | 11.735 | -10.779 | -4.484 | 1.00 | 0.00 |
| ATOM | 755 | 2HB  | ASP | 48 | 12.375 | -11.424 | -6.016 | 1.00 | 0.00 |
| ATOM | 756 | N    | MET | 49 | 14.815 | -10.982 | -3.763 | 1.00 | 0.00 |
| ATOM | 757 | CA   | MET | 49 | 16.069 | -10.228 | -3.901 | 1.00 | 0.00 |
| ATOM | 758 | C    | MET | 49 | 17.268 | -10.821 | -3.197 | 1.00 | 0.00 |
| ATOM | 759 | O    | MET | 49 | 18.338 | -10.212 | -3.218 | 1.00 | 0.00 |
| ATOM | 760 | CB   | MET | 49 | 15.885 | -8.800  | -3.390 | 1.00 | 0.00 |
| ATOM | 761 | CG   | MET | 49 | 14.839 | -7.992  | -4.144 | 1.00 | 0.00 |
| ATOM | 762 | SD   | MET | 49 | 15.277 | -7.729  | -5.874 | 1.00 | 0.00 |
| ATOM | 763 | CE   | MET | 49 | 16.669 | -6.616  | -5.706 | 1.00 | 0.00 |
| ATOM | 764 | H    | MET | 49 | 14.263 | -10.867 | -2.925 | 1.00 | 0.00 |
| ATOM | 765 | HA   | MET | 49 | 16.365 | -10.188 | -4.949 | 1.00 | 0.00 |
| ATOM | 766 | 1HB  | MET | 49 | 15.602 | -8.873  | -2.341 | 1.00 | 0.00 |
| ATOM | 767 | 2HB  | MET | 49 | 16.854 | -8.306  | -3.472 | 1.00 | 0.00 |
| ATOM | 768 | 1HG  | MET | 49 | 13.893 | -8.529  | -4.092 | 1.00 | 0.00 |
| ATOM | 769 | 2HG  | MET | 49 | 14.736 | -7.026  | -3.650 | 1.00 | 0.00 |
| ATOM | 770 | 1HE  | MET | 49 | 17.052 | -6.360  | -6.694 | 1.00 | 0.00 |
| ATOM | 771 | 2HE  | MET | 49 | 16.349 | -5.708  | -5.194 | 1.00 | 0.00 |
| ATOM | 772 | 3HE  | MET | 49 | 17.455 | -7.102  | -5.127 | 1.00 | 0.00 |
| ATOM | 773 | N    | VAL | 50 | 17.126 | -11.985 | -2.575 | 1.00 | 0.00 |
| ATOM | 774 | CA   | VAL | 50 | 18.262 | -12.571 | -1.870 | 1.00 | 0.00 |
| ATOM | 775 | C    | VAL | 50 | 19.549 | -12.728 | -2.682 | 1.00 | 0.00 |
| ATOM | 776 | O    | VAL | 50 | 20.614 | -12.254 | -2.264 | 1.00 | 0.00 |
| ATOM | 777 | CB   | VAL | 50 | 17.925 | -13.969 | -1.318 | 1.00 | 0.00 |
| ATOM | 778 | CG1  | VAL | 50 | 19.198 | -14.733 | -0.988 | 1.00 | 0.00 |
| ATOM | 779 | CG2  | VAL | 50 | 17.039 | -13.855 | -0.086 | 1.00 | 0.00 |
| ATOM | 780 | H    | VAL | 50 | 16.236 | -12.463 | -2.589 | 1.00 | 0.00 |
| ATOM | 781 | HA   | VAL | 50 | 18.584 | -11.938 | -1.042 | 1.00 | 0.00 |
| ATOM | 782 | HB   | VAL | 50 | 17.356 | -14.518 | -2.068 | 1.00 | 0.00 |
| ATOM | 783 | 1HG1 | VAL | 50 | 18.941 | -15.719 | -0.600 | 1.00 | 0.00 |
| ATOM | 784 | 2HG1 | VAL | 50 | 19.799 | -14.845 | -1.890 | 1.00 | 0.00 |
| ATOM | 785 | 3HG1 | VAL | 50 | 19.767 | -14.185 | -0.237 | 1.00 | 0.00 |
| ATOM | 786 | 1HG2 | VAL | 50 | 16.809 | -14.851 | 0.291  | 1.00 | 0.00 |
| ATOM | 787 | 2HG2 | VAL | 50 | 17.560 | -13.286 | 0.684  | 1.00 | 0.00 |
| ATOM | 788 | 3HG2 | VAL | 50 | 16.112 | -13.345 | -0.350 | 1.00 | 0.00 |
| ATOM | 789 | N    | GLU | 51 | 19.437 | -13.345 | -3.860 | 1.00 | 0.00 |
| ATOM | 790 | CA   | GLU | 51 | 20.594 | -13.565 | -4.735 | 1.00 | 0.00 |
| ATOM | 791 | C    | GLU | 51 | 21.226 | -12.262 | -5.223 | 1.00 | 0.00 |
| ATOM | 792 | O    | GLU | 51 | 22.440 | -12.067 | -5.093 | 1.00 | 0.00 |
| ATOM | 793 | CB   | GLU | 51 | 20.197 | -14.415 | -5.944 | 1.00 | 0.00 |
| ATOM | 794 | CG   | GLU | 51 | 19.920 | -15.877 | -5.621 | 1.00 | 0.00 |
| ATOM | 795 | CD   | GLU | 51 | 19.512 | -16.640 | -6.851 | 1.00 | 0.00 |
| ATOM | 796 | OE1  | GLU | 51 | 19.417 | -16.040 | -7.895 | 1.00 | 0.00 |

|      |     |     |     |    |        |         |        |      |      |
|------|-----|-----|-----|----|--------|---------|--------|------|------|
| ATOM | 797 | OE2 | GLU | 51 | 19.404 | -17.841 | -6.772 | 1.00 | 0.00 |
| ATOM | 798 | H   | GLU | 51 | 18.528 | -13.670 | -4.158 | 1.00 | 0.00 |
| ATOM | 799 | HA  | GLU | 51 | 21.379 | -14.086 | -4.186 | 1.00 | 0.00 |
| ATOM | 800 | 1HB | GLU | 51 | 19.302 | -13.962 | -6.371 | 1.00 | 0.00 |
| ATOM | 801 | 2HB | GLU | 51 | 21.015 | -14.351 | -6.662 | 1.00 | 0.00 |
| ATOM | 802 | 1HG | GLU | 51 | 20.759 | -16.382 | -5.143 | 1.00 | 0.00 |
| ATOM | 803 | 2HG | GLU | 51 | 19.082 | -15.832 | -4.927 | 1.00 | 0.00 |
| ATOM | 804 | N   | TRP | 52 | 20.402 | -11.370 | -5.768 | 1.00 | 0.00 |
| ATOM | 805 | CA  | TRP | 52 | 20.893 | -10.094 | -6.266 | 1.00 | 0.00 |
| ATOM | 806 | C   | TRP | 52 | 21.648 | -9.323  | -5.181 | 1.00 | 0.00 |
| ATOM | 807 | O   | TRP | 52 | 22.726 | -8.779  | -5.440 | 1.00 | 0.00 |
| ATOM | 808 | CB  | TRP | 52 | 19.735 | -9.247  | -6.797 | 1.00 | 0.00 |
| ATOM | 809 | CG  | TRP | 52 | 20.165 | -7.921  | -7.346 | 1.00 | 0.00 |
| ATOM | 810 | CD1 | TRP | 52 | 20.465 | -7.635  | -8.644 | 1.00 | 0.00 |
| ATOM | 811 | CD2 | TRP | 52 | 20.343 | -6.702  | -6.614 | 1.00 | 0.00 |
| ATOM | 812 | NE1 | TRP | 52 | 20.821 | -6.315  | -8.768 | 1.00 | 0.00 |
| ATOM | 813 | CE2 | TRP | 52 | 20.752 | -5.720  | -7.534 | 1.00 | 0.00 |
| ATOM | 814 | CE3 | TRP | 52 | 20.195 | -6.347  | -5.268 | 1.00 | 0.00 |
| ATOM | 815 | CZ2 | TRP | 52 | 21.016 | -4.412  | -7.156 | 1.00 | 0.00 |
| ATOM | 816 | CZ3 | TRP | 52 | 20.458 | -5.036  | -4.889 | 1.00 | 0.00 |
| ATOM | 817 | CH2 | TRP | 52 | 20.856 | -4.096  | -5.807 | 1.00 | 0.00 |
| ATOM | 818 | H   | TRP | 52 | 19.417 | -11.583 | -5.837 | 1.00 | 0.00 |
| ATOM | 819 | HE1 | TRP | 52 | 21.089 | -5.856  | -9.626 | 1.00 | 0.00 |
| ATOM | 820 | HD1 | TRP | 52 | 20.385 | -8.452  | -9.360 | 1.00 | 0.00 |
| ATOM | 821 | HZ2 | TRP | 52 | 21.329 | -3.698  | -7.917 | 1.00 | 0.00 |
| ATOM | 822 | HH2 | TRP | 52 | 21.052 | -3.078  | -5.469 | 1.00 | 0.00 |
| ATOM | 823 | HZ3 | TRP | 52 | 20.340 | -4.773  | -3.838 | 1.00 | 0.00 |
| ATOM | 824 | HE3 | TRP | 52 | 19.880 | -7.052  | -4.499 | 1.00 | 0.00 |
| ATOM | 825 | HA  | TRP | 52 | 21.602 | -10.262 | -7.077 | 1.00 | 0.00 |
| ATOM | 826 | 1HB | TRP | 52 | 19.226 | -9.769  | -7.607 | 1.00 | 0.00 |
| ATOM | 827 | 2HB | TRP | 52 | 19.025 | -9.038  | -5.997 | 1.00 | 0.00 |
| ATOM | 828 | N   | PHE | 53 | 21.115 | -9.296  | -3.961 | 1.00 | 0.00 |
| ATOM | 829 | CA  | PHE | 53 | 21.782 | -8.584  | -2.877 | 1.00 | 0.00 |
| ATOM | 830 | C   | PHE | 53 | 23.091 | -9.266  | -2.488 | 1.00 | 0.00 |
| ATOM | 831 | O   | PHE | 53 | 24.088 | -8.593  | -2.251 | 1.00 | 0.00 |
| ATOM | 832 | CB  | PHE | 53 | 20.862 | -8.481  | -1.659 | 1.00 | 0.00 |
| ATOM | 833 | CG  | PHE | 53 | 21.349 | -7.523  | -0.610 | 1.00 | 0.00 |
| ATOM | 834 | CD1 | PHE | 53 | 21.208 | -6.154  | -0.782 | 1.00 | 0.00 |
| ATOM | 835 | CD2 | PHE | 53 | 21.950 | -7.988  | 0.550  | 1.00 | 0.00 |
| ATOM | 836 | CE1 | PHE | 53 | 21.656 | -5.271  | 0.182  | 1.00 | 0.00 |
| ATOM | 837 | CE2 | PHE | 53 | 22.398 | -7.108  | 1.516  | 1.00 | 0.00 |
| ATOM | 838 | CZ  | PHE | 53 | 22.251 | -5.748  | 1.331  | 1.00 | 0.00 |
| ATOM | 839 | H   | PHE | 53 | 20.242 | -9.772  | -3.785 | 1.00 | 0.00 |
| ATOM | 840 | HD1 | PHE | 53 | 20.737 | -5.777  | -1.690 | 1.00 | 0.00 |
| ATOM | 841 | HE1 | PHE | 53 | 22.868 | -7.486  | 2.424  | 1.00 | 0.00 |
| ATOM | 842 | HZ  | PHE | 53 | 22.606 | -5.053  | 2.091  | 1.00 | 0.00 |
| ATOM | 843 | HE2 | PHE | 53 | 22.868 | -7.486  | 2.424  | 1.00 | 0.00 |
| ATOM | 844 | HD2 | PHE | 53 | 22.067 | -9.062  | 0.695  | 1.00 | 0.00 |
| ATOM | 845 | HA  | PHE | 53 | 22.043 | -7.576  | -3.202 | 1.00 | 0.00 |
| ATOM | 846 | 1HB | PHE | 53 | 19.875 | -8.135  | -1.962 | 1.00 | 0.00 |
| ATOM | 847 | 2HB | PHE | 53 | 20.772 | -9.453  | -1.175 | 1.00 | 0.00 |
| ATOM | 848 | N   | LEU | 54 | 23.105 | -10.592 | -2.452 | 1.00 | 0.00 |
| ATOM | 849 | CA  | LEU | 54 | 24.320 | -11.300 | -2.096 | 1.00 | 0.00 |
| ATOM | 850 | C   | LEU | 54 | 25.410 | -11.043 | -3.134 | 1.00 | 0.00 |
| ATOM | 851 | O   | LEU | 54 | 26.559 | -10.781 | -2.775 | 1.00 | 0.00 |
| ATOM | 852 | CB  | LEU | 54 | 24.059 | -12.806 | -1.961 | 1.00 | 0.00 |
| ATOM | 853 | CG  | LEU | 54 | 23.082 | -13.242 | -0.865 | 1.00 | 0.00 |

|      |     |      |     |    |        |         |        |      |      |
|------|-----|------|-----|----|--------|---------|--------|------|------|
| ATOM | 854 | CD1  | LEU | 54 | 22.990 | -14.750 | -0.689 | 1.00 | 0.00 |
| ATOM | 855 | CD2  | LEU | 54 | 23.315 | -12.554 | 0.472  | 1.00 | 0.00 |
| ATOM | 856 | H    | LEU | 54 | 22.267 | -11.110 | -2.673 | 1.00 | 0.00 |
| ATOM | 857 | HA   | LEU | 54 | 24.695 | -10.925 | -1.144 | 1.00 | 0.00 |
| ATOM | 858 | 1HB  | LEU | 54 | 23.618 | -12.998 | -2.938 | 1.00 | 0.00 |
| ATOM | 859 | 2HB  | LEU | 54 | 24.987 | -13.369 | -1.865 | 1.00 | 0.00 |
| ATOM | 860 | HG   | LEU | 54 | 22.101 | -12.847 | -1.130 | 1.00 | 0.00 |
| ATOM | 861 | 1HD1 | LEU | 54 | 22.279 | -14.982 | 0.104  | 1.00 | 0.00 |
| ATOM | 862 | 2HD1 | LEU | 54 | 22.654 | -15.205 | -1.621 | 1.00 | 0.00 |
| ATOM | 863 | 3HD1 | LEU | 54 | 23.970 | -15.146 | -0.424 | 1.00 | 0.00 |
| ATOM | 864 | 1HD2 | LEU | 54 | 22.584 | -12.913 | 1.198  | 1.00 | 0.00 |
| ATOM | 865 | 2HD2 | LEU | 54 | 24.321 | -12.779 | 0.827  | 1.00 | 0.00 |
| ATOM | 866 | 3HD2 | LEU | 54 | 23.206 | -11.476 | 0.351  | 1.00 | 0.00 |
| ATOM | 867 | N    | GLU | 55 | 25.038 | -11.070 | -4.414 | 1.00 | 0.00 |
| ATOM | 868 | CA   | GLU | 55 | 25.991 | -10.833 | -5.502 | 1.00 | 0.00 |
| ATOM | 869 | C    | GLU | 55 | 26.614 | -9.439  | -5.375 | 1.00 | 0.00 |
| ATOM | 870 | O    | GLU | 55 | 27.831 | -9.266  | -5.534 | 1.00 | 0.00 |
| ATOM | 871 | CB   | GLU | 55 | 25.304 | -10.991 | -6.860 | 1.00 | 0.00 |
| ATOM | 872 | CG   | GLU | 55 | 24.914 | -12.421 | -7.205 | 1.00 | 0.00 |
| ATOM | 873 | CD   | GLU | 55 | 24.222 | -12.492 | -8.538 | 1.00 | 0.00 |
| ATOM | 874 | OE1  | GLU | 55 | 24.027 | -11.464 | -9.141 | 1.00 | 0.00 |
| ATOM | 875 | OE2  | GLU | 55 | 23.989 | -13.581 | -9.007 | 1.00 | 0.00 |
| ATOM | 876 | H    | GLU | 55 | 24.072 | -11.259 | -4.640 | 1.00 | 0.00 |
| ATOM | 877 | HA   | GLU | 55 | 26.809 | -11.552 | -5.440 | 1.00 | 0.00 |
| ATOM | 878 | 1HB  | GLU | 55 | 24.410 | -10.367 | -6.839 | 1.00 | 0.00 |
| ATOM | 879 | 2HB  | GLU | 55 | 25.995 | -10.612 | -7.613 | 1.00 | 0.00 |
| ATOM | 880 | 1HG  | GLU | 55 | 25.755 | -13.114 | -7.196 | 1.00 | 0.00 |
| ATOM | 881 | 2HG  | GLU | 55 | 24.213 | -12.692 | -6.417 | 1.00 | 0.00 |
| ATOM | 882 | N    | MET | 56 | 25.769 | -8.451  | -5.089 | 1.00 | 0.00 |
| ATOM | 883 | CA   | MET | 56 | 26.216 | -7.077  | -4.935 | 1.00 | 0.00 |
| ATOM | 884 | C    | MET | 56 | 27.186 | -6.983  | -3.760 | 1.00 | 0.00 |
| ATOM | 885 | O    | MET | 56 | 28.213 | -6.302  | -3.842 | 1.00 | 0.00 |
| ATOM | 886 | CB   | MET | 56 | 25.018 | -6.152  | -4.734 | 1.00 | 0.00 |
| ATOM | 887 | CG   | MET | 56 | 24.160 | -5.953  | -5.976 | 1.00 | 0.00 |
| ATOM | 888 | SD   | MET | 56 | 24.925 | -4.849  | -7.180 | 1.00 | 0.00 |
| ATOM | 889 | CE   | MET | 56 | 24.828 | -3.285  | -6.314 | 1.00 | 0.00 |
| ATOM | 890 | H    | MET | 56 | 24.788 | -8.663  | -4.976 | 1.00 | 0.00 |
| ATOM | 891 | HA   | MET | 56 | 26.756 | -6.760  | -5.827 | 1.00 | 0.00 |
| ATOM | 892 | 1HB  | MET | 56 | 24.412 | -6.586  | -3.940 | 1.00 | 0.00 |
| ATOM | 893 | 2HB  | MET | 56 | 25.412 | -5.189  | -4.407 | 1.00 | 0.00 |
| ATOM | 894 | 1HG  | MET | 56 | 23.997 | -6.927  | -6.436 | 1.00 | 0.00 |
| ATOM | 895 | 2HG  | MET | 56 | 23.204 | -5.534  | -5.664 | 1.00 | 0.00 |
| ATOM | 896 | 1HE  | MET | 56 | 25.263 | -2.499  | -6.932 | 1.00 | 0.00 |
| ATOM | 897 | 2HE  | MET | 56 | 23.784 | -3.048  | -6.106 | 1.00 | 0.00 |
| ATOM | 898 | 3HE  | MET | 56 | 25.378 | -3.355  | -5.375 | 1.00 | 0.00 |
| ATOM | 899 | N    | LEU | 57 | 26.852 | -7.654  | -2.665 | 1.00 | 0.00 |
| ATOM | 900 | CA   | LEU | 57 | 27.698 | -7.642  | -1.481 | 1.00 | 0.00 |
| ATOM | 901 | C    | LEU | 57 | 29.087 | -8.163  | -1.821 | 1.00 | 0.00 |
| ATOM | 902 | O    | LEU | 57 | 30.090 | -7.487  | -1.588 | 1.00 | 0.00 |
| ATOM | 903 | CB   | LEU | 57 | 27.076 | -8.476  | -0.353 | 1.00 | 0.00 |
| ATOM | 904 | CG   | LEU | 57 | 25.889 | -7.857  | 0.389  | 1.00 | 0.00 |
| ATOM | 905 | CD1  | LEU | 57 | 25.260 | -8.780  | 1.422  | 1.00 | 0.00 |
| ATOM | 906 | CD2  | LEU | 57 | 26.188 | -6.493  | 0.995  | 1.00 | 0.00 |
| ATOM | 907 | H    | LEU | 57 | 25.992 | -8.184  | -2.653 | 1.00 | 0.00 |
| ATOM | 908 | HA   | LEU | 57 | 27.820 | -6.618  | -1.130 | 1.00 | 0.00 |
| ATOM | 909 | 1HB  | LEU | 57 | 26.735 | -9.332  | -0.933 | 1.00 | 0.00 |
| ATOM | 910 | 2HB  | LEU | 57 | 27.825 | -8.801  | 0.369  | 1.00 | 0.00 |



|      |     |      |     |    |        |         |        |      |      |
|------|-----|------|-----|----|--------|---------|--------|------|------|
| ATOM | 911 | HG   | LEU | 57 | 25.143 | -7.589  | -0.360 | 1.00 | 0.00 |
| ATOM | 912 | 1HD1 | LEU | 57 | 24.426 | -8.271  | 1.905  | 1.00 | 0.00 |
| ATOM | 913 | 2HD1 | LEU | 57 | 24.897 | -9.683  | 0.930  | 1.00 | 0.00 |
| ATOM | 914 | 3HD1 | LEU | 57 | 26.004 | -9.048  | 2.171  | 1.00 | 0.00 |
| ATOM | 915 | 1HD2 | LEU | 57 | 25.299 | -6.119  | 1.503  | 1.00 | 0.00 |
| ATOM | 916 | 2HD2 | LEU | 57 | 27.005 | -6.584  | 1.711  | 1.00 | 0.00 |
| ATOM | 917 | 3HD2 | LEU | 57 | 26.473 | -5.798  | 0.205  | 1.00 | 0.00 |
| ATOM | 918 | N    | LYS | 58 | 29.133 | -9.359  | -2.400 | 1.00 | 0.00 |
| ATOM | 919 | CA   | LYS | 58 | 30.393 | -9.984  | -2.783 | 1.00 | 0.00 |
| ATOM | 920 | C    | LYS | 58 | 31.152 | -9.139  | -3.801 | 1.00 | 0.00 |
| ATOM | 921 | O    | LYS | 58 | 32.365 | -8.974  | -3.686 | 1.00 | 0.00 |
| ATOM | 922 | CB   | LYS | 58 | 30.147 | -11.384 | -3.349 | 1.00 | 0.00 |
| ATOM | 923 | CG   | LYS | 58 | 29.751 | -12.422 | -2.307 | 1.00 | 0.00 |
| ATOM | 924 | CD   | LYS | 58 | 29.540 | -13.789 | -2.941 | 1.00 | 0.00 |
| ATOM | 925 | CE   | LYS | 58 | 29.149 | -14.828 | -1.901 | 1.00 | 0.00 |
| ATOM | 926 | NZ   | LYS | 58 | 28.917 | -16.166 | -2.511 | 1.00 | 0.00 |
| ATOM | 927 | H    | LYS | 58 | 28.269 | -9.849  | -2.580 | 1.00 | 0.00 |
| ATOM | 928 | 1HZ  | LYS | 58 | 28.660 | -16.824 | -1.789 | 1.00 | 0.00 |
| ATOM | 929 | 2HZ  | LYS | 58 | 28.170 | -16.102 | -3.189 | 1.00 | 0.00 |
| ATOM | 930 | 3HZ  | LYS | 58 | 29.761 | -16.479 | -2.967 | 1.00 | 0.00 |
| ATOM | 931 | HA   | LYS | 58 | 31.042 | -10.071 | -1.911 | 1.00 | 0.00 |
| ATOM | 932 | 1HB  | LYS | 58 | 29.353 | -11.293 | -4.091 | 1.00 | 0.00 |
| ATOM | 933 | 2HB  | LYS | 58 | 31.068 | -11.697 | -3.840 | 1.00 | 0.00 |
| ATOM | 934 | 1HG  | LYS | 58 | 30.545 | -12.485 | -1.562 | 1.00 | 0.00 |
| ATOM | 935 | 2HG  | LYS | 58 | 28.828 | -12.097 | -1.827 | 1.00 | 0.00 |
| ATOM | 936 | 1HD  | LYS | 58 | 28.750 | -13.707 | -3.689 | 1.00 | 0.00 |
| ATOM | 937 | 2HD  | LYS | 58 | 30.467 | -14.094 | -3.426 | 1.00 | 0.00 |
| ATOM | 938 | 1HE  | LYS | 58 | 29.952 | -14.897 | -1.169 | 1.00 | 0.00 |
| ATOM | 939 | 2HE  | LYS | 58 | 28.237 | -14.491 | -1.408 | 1.00 | 0.00 |
| ATOM | 940 | N    | ALA | 59 | 30.432 | -8.562  | -4.762 | 1.00 | 0.00 |
| ATOM | 941 | CA   | ALA | 59 | 31.063 | -7.732  | -5.782 | 1.00 | 0.00 |
| ATOM | 942 | C    | ALA | 59 | 31.773 | -6.526  | -5.161 | 1.00 | 0.00 |
| ATOM | 943 | O    | ALA | 59 | 32.662 | -5.943  | -5.781 | 1.00 | 0.00 |
| ATOM | 944 | CB   | ALA | 59 | 30.033 | -7.273  | -6.803 | 1.00 | 0.00 |
| ATOM | 945 | H    | ALA | 59 | 29.432 | -8.702  | -4.785 | 1.00 | 0.00 |
| ATOM | 946 | HA   | ALA | 59 | 31.821 | -8.324  | -6.295 | 1.00 | 0.00 |
| ATOM | 947 | 1HB  | ALA | 59 | 30.520 | -6.655  | -7.557 | 1.00 | 0.00 |
| ATOM | 948 | 2HB  | ALA | 59 | 29.583 | -8.142  | -7.282 | 1.00 | 0.00 |
| ATOM | 949 | 3HB  | ALA | 59 | 29.259 | -6.692  | -6.303 | 1.00 | 0.00 |
| ATOM | 950 | N    | LYS | 60 | 31.343 | -6.118  | -3.968 | 1.00 | 0.00 |
| ATOM | 951 | CA   | LYS | 60 | 31.959 | -4.978  | -3.287 | 1.00 | 0.00 |
| ATOM | 952 | C    | LYS | 60 | 32.936 | -5.508  | -2.233 | 1.00 | 0.00 |
| ATOM | 953 | O    | LYS | 60 | 33.579 | -4.737  | -1.509 | 1.00 | 0.00 |
| ATOM | 954 | CB   | LYS | 60 | 30.887 | -4.086  | -2.659 | 1.00 | 0.00 |
| ATOM | 955 | CG   | LYS | 60 | 30.206 | -3.138  | -3.637 | 1.00 | 0.00 |
| ATOM | 956 | CD   | LYS | 60 | 31.161 | -2.053  | -4.112 | 1.00 | 0.00 |
| ATOM | 957 | CE   | LYS | 60 | 30.466 | -1.072  | -5.045 | 1.00 | 0.00 |
| ATOM | 958 | NZ   | LYS | 60 | 31.400 | -0.031  | -5.554 | 1.00 | 0.00 |
| ATOM | 959 | H    | LYS | 60 | 30.577 | -6.605  | -3.525 | 1.00 | 0.00 |
| ATOM | 960 | 1HZ  | LYS | 60 | 30.901 | 0.598   | -6.168 | 1.00 | 0.00 |
| ATOM | 961 | 2HZ  | LYS | 60 | 31.781 | 0.489   | -4.776 | 1.00 | 0.00 |
| ATOM | 962 | 3HZ  | LYS | 60 | 32.151 | -0.473  | -6.064 | 1.00 | 0.00 |
| ATOM | 963 | HA   | LYS | 60 | 32.530 | -4.385  | -4.003 | 1.00 | 0.00 |
| ATOM | 964 | 1HB  | LYS | 60 | 30.142 | -4.747  | -2.215 | 1.00 | 0.00 |
| ATOM | 965 | 2HB  | LYS | 60 | 31.372 | -3.508  | -1.872 | 1.00 | 0.00 |
| ATOM | 966 | 1HG  | LYS | 60 | 29.857 | -3.716  | -4.493 | 1.00 | 0.00 |
| ATOM | 967 | 2HG  | LYS | 60 | 29.353 | -2.679  | -3.138 | 1.00 | 0.00 |

|      |      |      |     |    |        |         |        |      |      |
|------|------|------|-----|----|--------|---------|--------|------|------|
| ATOM | 968  | 1HD  | LYS | 60 | 31.541 | -1.519  | -3.240 | 1.00 | 0.00 |
| ATOM | 969  | 2HD  | LYS | 60 | 31.991 | -2.526  | -4.637 | 1.00 | 0.00 |
| ATOM | 970  | 1HE  | LYS | 60 | 30.054 | -1.631  | -5.884 | 1.00 | 0.00 |
| ATOM | 971  | 2HE  | LYS | 60 | 29.655 | -0.594  | -4.495 | 1.00 | 0.00 |
| ATOM | 972  | N    | GLY | 61 | 33.033 | -6.831  | -2.150 | 1.00 | 0.00 |
| ATOM | 973  | CA   | GLY | 61 | 33.918 | -7.463  | -1.190 | 1.00 | 0.00 |
| ATOM | 974  | C    | GLY | 61 | 33.420 | -7.265  | 0.232  | 1.00 | 0.00 |
| ATOM | 975  | O    | GLY | 61 | 34.210 | -7.261  | 1.180  | 1.00 | 0.00 |
| ATOM | 976  | H    | GLY | 61 | 32.480 | -7.408  | -2.768 | 1.00 | 0.00 |
| ATOM | 977  | 1HA  | GLY | 61 | 33.969 | -8.531  | -1.402 | 1.00 | 0.00 |
| ATOM | 978  | 2HA  | GLY | 61 | 34.912 | -7.027  | -1.281 | 1.00 | 0.00 |
| ATOM | 979  | N    | ILE | 62 | 32.111 | -7.077  | 0.387  | 1.00 | 0.00 |
| ATOM | 980  | CA   | ILE | 62 | 31.538 | -6.877  | 1.705  | 1.00 | 0.00 |
| ATOM | 981  | C    | ILE | 62 | 31.237 | -8.230  | 2.302  | 1.00 | 0.00 |
| ATOM | 982  | O    | ILE | 62 | 30.619 | -9.082  | 1.661  | 1.00 | 0.00 |
| ATOM | 983  | CB   | ILE | 62 | 30.264 | -6.015  | 1.642  | 1.00 | 0.00 |
| ATOM | 984  | CG1  | ILE | 62 | 30.588 | -4.622  | 1.096  | 1.00 | 0.00 |
| ATOM | 985  | CG2  | ILE | 62 | 29.622 | -5.914  | 3.017  | 1.00 | 0.00 |
| ATOM | 986  | CD1  | ILE | 62 | 29.366 | -3.790  | 0.781  | 1.00 | 0.00 |
| ATOM | 987  | H    | ILE | 62 | 31.509 | -7.074  | -0.424 | 1.00 | 0.00 |
| ATOM | 988  | HA   | ILE | 62 | 32.261 | -6.407  | 2.371  | 1.00 | 0.00 |
| ATOM | 989  | HB   | ILE | 62 | 29.562 | -6.470  | 0.944  | 1.00 | 0.00 |
| ATOM | 990  | 1HG2 | ILE | 62 | 28.723 | -5.301  | 2.955  | 1.00 | 0.00 |
| ATOM | 991  | 2HG2 | ILE | 62 | 29.358 | -6.910  | 3.369  | 1.00 | 0.00 |
| ATOM | 992  | 3HG2 | ILE | 62 | 30.325 | -5.457  | 3.714  | 1.00 | 0.00 |
| ATOM | 993  | 1HG1 | ILE | 62 | 31.191 | -4.112  | 1.846  | 1.00 | 0.00 |
| ATOM | 994  | 2HG1 | ILE | 62 | 31.177 | -4.759  | 0.189  | 1.00 | 0.00 |
| ATOM | 995  | 1HD1 | ILE | 62 | 29.676 | -2.817  | 0.399  | 1.00 | 0.00 |
| ATOM | 996  | 2HD1 | ILE | 62 | 28.762 | -4.299  | 0.029  | 1.00 | 0.00 |
| ATOM | 997  | 3HD1 | ILE | 62 | 28.776 | -3.651  | 1.686  | 1.00 | 0.00 |
| ATOM | 998  | N    | PRO | 63 | 31.766 | -8.438  | 3.504  | 1.00 | 0.00 |
| ATOM | 999  | CA   | PRO | 63 | 31.593 | -9.682  | 4.241  | 1.00 | 0.00 |
| ATOM | 1000 | C    | PRO | 63 | 30.208 | -9.764  | 4.882  | 1.00 | 0.00 |
| ATOM | 1001 | O    | PRO | 63 | 29.697 | -8.763  | 5.395  | 1.00 | 0.00 |
| ATOM | 1002 | CB   | PRO | 63 | 32.659 | -9.772  | 5.320  | 1.00 | 0.00 |
| ATOM | 1003 | CG   | PRO | 63 | 33.164 | -8.363  | 5.491  | 1.00 | 0.00 |
| ATOM | 1004 | CD   | PRO | 63 | 32.903 | -7.674  | 4.031  | 1.00 | 0.00 |
| ATOM | 1005 | 1HD  | PRO | 63 | 32.576 | -6.780  | 4.089  | 1.00 | 0.00 |
| ATOM | 1006 | 2HD  | PRO | 63 | 33.592 | -7.854  | 3.399  | 1.00 | 0.00 |
| ATOM | 1007 | 1HG  | PRO | 63 | 32.611 | -7.936  | 5.970  | 1.00 | 0.00 |
| ATOM | 1008 | 2HG  | PRO | 63 | 34.101 | -8.398  | 5.492  | 1.00 | 0.00 |
| ATOM | 1009 | 1HB  | PRO | 63 | 32.144 | -9.957  | 6.053  | 1.00 | 0.00 |
| ATOM | 1010 | 2HB  | PRO | 63 | 33.274 | -10.223 | 4.910  | 1.00 | 0.00 |
| ATOM | 1011 | HA   | PRO | 63 | 31.700 | -10.461 | 3.629  | 1.00 | 0.00 |
| ATOM | 1012 | N    | PHE | 64 | 29.608 | -10.950 | 4.847  | 1.00 | 0.00 |
| ATOM | 1013 | CA   | PHE | 64 | 28.281 | -11.156 | 5.423  | 1.00 | 0.00 |
| ATOM | 1014 | C    | PHE | 64 | 28.078 | -12.628 | 5.755  | 1.00 | 0.00 |
| ATOM | 1015 | O    | PHE | 64 | 28.870 | -13.482 | 5.353  | 1.00 | 0.00 |
| ATOM | 1016 | CB   | PHE | 64 | 27.198 | -10.664 | 4.461  | 1.00 | 0.00 |
| ATOM | 1017 | CG   | PHE | 64 | 27.174 | -11.397 | 3.150  | 1.00 | 0.00 |
| ATOM | 1018 | CD1  | PHE | 64 | 26.382 | -12.524 | 2.984  | 1.00 | 0.00 |
| ATOM | 1019 | CD2  | PHE | 64 | 27.943 | -10.963 | 2.081  | 1.00 | 0.00 |
| ATOM | 1020 | CE1  | PHE | 64 | 26.359 | -13.199 | 1.778  | 1.00 | 0.00 |
| ATOM | 1021 | CE2  | PHE | 64 | 27.921 | -11.636 | 0.874  | 1.00 | 0.00 |
| ATOM | 1022 | CZ   | PHE | 64 | 27.128 | -12.756 | 0.724  | 1.00 | 0.00 |
| ATOM | 1023 | H    | PHE | 64 | 30.082 | -11.728 | 4.411  | 1.00 | 0.00 |
| ATOM | 1024 | HD1  | PHE | 64 | 25.773 | -12.874 | 3.817  | 1.00 | 0.00 |

|      |      |      |     |    |        |         |        |      |      |
|------|------|------|-----|----|--------|---------|--------|------|------|
| ATOM | 1025 | HE1  | PHE | 64 | 28.530 | -11.284 | 0.041  | 1.00 | 0.00 |
| ATOM | 1026 | HZ   | PHE | 64 | 27.111 | -13.288 | -0.226 | 1.00 | 0.00 |
| ATOM | 1027 | HE2  | PHE | 64 | 28.530 | -11.284 | 0.041  | 1.00 | 0.00 |
| ATOM | 1028 | HD2  | PHE | 64 | 28.570 | -10.079 | 2.200  | 1.00 | 0.00 |
| ATOM | 1029 | HA   | PHE | 64 | 28.193 | -10.602 | 6.359  | 1.00 | 0.00 |
| ATOM | 1030 | 1HB  | PHE | 64 | 26.213 | -10.792 | 4.908  | 1.00 | 0.00 |
| ATOM | 1031 | 2HB  | PHE | 64 | 27.356 | -9.612  | 4.227  | 1.00 | 0.00 |
| ATOM | 1032 | N    | THR | 65 | 27.010 | -12.908 | 6.490  | 1.00 | 0.00 |
| ATOM | 1033 | CA   | THR | 65 | 26.657 | -14.264 | 6.876  | 1.00 | 0.00 |
| ATOM | 1034 | C    | THR | 65 | 25.144 | -14.312 | 7.083  | 1.00 | 0.00 |
| ATOM | 1035 | O    | THR | 65 | 24.502 | -13.270 | 7.253  | 1.00 | 0.00 |
| ATOM | 1036 | CB   | THR | 65 | 27.400 | -14.700 | 8.152  | 1.00 | 0.00 |
| ATOM | 1037 | OG1  | THR | 65 | 27.175 | -16.096 | 8.386  | 1.00 | 0.00 |
| ATOM | 1038 | CG2  | THR | 65 | 26.912 | -13.904 | 9.352  | 1.00 | 0.00 |
| ATOM | 1039 | H    | THR | 65 | 26.418 | -12.148 | 6.794  | 1.00 | 0.00 |
| ATOM | 1040 | HG1  | THR | 65 | 27.639 | -16.365 | 9.182  | 1.00 | 0.00 |
| ATOM | 1041 | HA   | THR | 65 | 26.910 | -14.954 | 6.071  | 1.00 | 0.00 |
| ATOM | 1042 | HB   | THR | 65 | 28.468 | -14.531 | 8.015  | 1.00 | 0.00 |
| ATOM | 1043 | 1HG2 | THR | 65 | 27.449 | -14.226 | 10.244 | 1.00 | 0.00 |
| ATOM | 1044 | 2HG2 | THR | 65 | 27.093 | -12.843 | 9.182  | 1.00 | 0.00 |
| ATOM | 1045 | 3HG2 | THR | 65 | 25.845 | -14.073 | 9.490  | 1.00 | 0.00 |
| ATOM | 1046 | N    | VAL | 66 | 24.568 | -15.502 | 6.968  | 1.00 | 0.00 |
| ATOM | 1047 | CA   | VAL | 66 | 23.133 | -15.676 | 7.139  | 1.00 | 0.00 |
| ATOM | 1048 | C    | VAL | 66 | 22.850 | -15.875 | 8.619  | 1.00 | 0.00 |
| ATOM | 1049 | O    | VAL | 66 | 23.307 | -16.850 | 9.221  | 1.00 | 0.00 |
| ATOM | 1050 | CB   | VAL | 66 | 22.607 | -16.869 | 6.319  | 1.00 | 0.00 |
| ATOM | 1051 | CG1  | VAL | 66 | 21.113 | -17.051 | 6.542  | 1.00 | 0.00 |
| ATOM | 1052 | CG2  | VAL | 66 | 22.903 | -16.672 | 4.841  | 1.00 | 0.00 |
| ATOM | 1053 | H    | VAL | 66 | 25.140 | -16.307 | 6.756  | 1.00 | 0.00 |
| ATOM | 1054 | HA   | VAL | 66 | 22.587 | -14.781 | 6.840  | 1.00 | 0.00 |
| ATOM | 1055 | HB   | VAL | 66 | 23.133 | -17.772 | 6.629  | 1.00 | 0.00 |
| ATOM | 1056 | 1HG1 | VAL | 66 | 20.758 | -17.899 | 5.955  | 1.00 | 0.00 |
| ATOM | 1057 | 2HG1 | VAL | 66 | 20.923 | -17.237 | 7.599  | 1.00 | 0.00 |
| ATOM | 1058 | 3HG1 | VAL | 66 | 20.586 | -16.149 | 6.231  | 1.00 | 0.00 |
| ATOM | 1059 | 1HG2 | VAL | 66 | 22.525 | -17.524 | 4.277  | 1.00 | 0.00 |
| ATOM | 1060 | 2HG2 | VAL | 66 | 22.417 | -15.761 | 4.492  | 1.00 | 0.00 |
| ATOM | 1061 | 3HG2 | VAL | 66 | 23.980 | -16.589 | 4.693  | 1.00 | 0.00 |
| ATOM | 1062 | N    | TYR | 67 | 22.158 | -14.909 | 9.207  | 1.00 | 0.00 |
| ATOM | 1063 | CA   | TYR | 67 | 21.819 | -14.977 | 10.616 | 1.00 | 0.00 |
| ATOM | 1064 | C    | TYR | 67 | 20.524 | -15.780 | 10.770 | 1.00 | 0.00 |
| ATOM | 1065 | O    | TYR | 67 | 20.451 | -16.700 | 11.586 | 1.00 | 0.00 |
| ATOM | 1066 | CB   | TYR | 67 | 21.677 | -13.570 | 11.201 | 1.00 | 0.00 |
| ATOM | 1067 | CG   | TYR | 67 | 21.368 | -13.550 | 12.682 | 1.00 | 0.00 |
| ATOM | 1068 | CD1  | TYR | 67 | 22.296 | -13.998 | 13.610 | 1.00 | 0.00 |
| ATOM | 1069 | CD2  | TYR | 67 | 20.149 | -13.081 | 13.147 | 1.00 | 0.00 |
| ATOM | 1070 | CE1  | TYR | 67 | 22.019 | -13.982 | 14.963 | 1.00 | 0.00 |
| ATOM | 1071 | CE2  | TYR | 67 | 19.860 | -13.060 | 14.498 | 1.00 | 0.00 |
| ATOM | 1072 | CZ   | TYR | 67 | 20.799 | -13.511 | 15.403 | 1.00 | 0.00 |
| ATOM | 1073 | OH   | TYR | 67 | 20.517 | -13.492 | 16.750 | 1.00 | 0.00 |
| ATOM | 1074 | H    | TYR | 67 | 21.861 | -14.111 | 8.664  | 1.00 | 0.00 |
| ATOM | 1075 | HH   | TYR | 67 | 21.238 | -13.827 | 17.290 | 1.00 | 0.00 |
| ATOM | 1076 | HD1  | TYR | 67 | 23.258 | -14.368 | 13.255 | 1.00 | 0.00 |
| ATOM | 1077 | HE1  | TYR | 67 | 22.758 | -14.338 | 15.681 | 1.00 | 0.00 |
| ATOM | 1078 | HE2  | TYR | 67 | 18.895 | -12.688 | 14.843 | 1.00 | 0.00 |
| ATOM | 1079 | HD2  | TYR | 67 | 19.411 | -12.726 | 12.426 | 1.00 | 0.00 |
| ATOM | 1080 | HA   | TYR | 67 | 22.604 | -15.503 | 11.161 | 1.00 | 0.00 |
| ATOM | 1081 | 1HB  | TYR | 67 | 22.618 | -13.048 | 11.019 | 1.00 | 0.00 |

|      |      |      |     |    |        |         |        |      |      |
|------|------|------|-----|----|--------|---------|--------|------|------|
| ATOM | 1082 | 2HB  | TYR | 67 | 20.875 | -13.074 | 10.656 | 1.00 | 0.00 |
| ATOM | 1083 | N    | VAL | 68 | 19.508 | -15.443 | 9.976  | 1.00 | 0.00 |
| ATOM | 1084 | CA   | VAL | 68 | 18.226 | -16.143 | 10.024 | 1.00 | 0.00 |
| ATOM | 1085 | C    | VAL | 68 | 17.973 | -16.655 | 8.606  | 1.00 | 0.00 |
| ATOM | 1086 | O    | VAL | 68 | 17.898 | -15.867 | 7.661  | 1.00 | 0.00 |
| ATOM | 1087 | CB   | VAL | 68 | 17.095 | -15.218 | 10.511 | 1.00 | 0.00 |
| ATOM | 1088 | CG1  | VAL | 68 | 15.767 | -15.960 | 10.519 | 1.00 | 0.00 |
| ATOM | 1089 | CG2  | VAL | 68 | 17.409 | -14.676 | 11.897 | 1.00 | 0.00 |
| ATOM | 1090 | H    | VAL | 68 | 19.627 | -14.682 | 9.323  | 1.00 | 0.00 |
| ATOM | 1091 | HA   | VAL | 68 | 18.273 | -17.012 | 10.682 | 1.00 | 0.00 |
| ATOM | 1092 | HB   | VAL | 68 | 17.028 | -14.359 | 9.843  | 1.00 | 0.00 |
| ATOM | 1093 | 1HG1 | VAL | 68 | 14.979 | -15.291 | 10.866 | 1.00 | 0.00 |
| ATOM | 1094 | 2HG1 | VAL | 68 | 15.535 | -16.302 | 9.510  | 1.00 | 0.00 |
| ATOM | 1095 | 3HG1 | VAL | 68 | 15.834 | -16.818 | 11.188 | 1.00 | 0.00 |
| ATOM | 1096 | 1HG2 | VAL | 68 | 16.600 | -14.024 | 12.225 | 1.00 | 0.00 |
| ATOM | 1097 | 2HG2 | VAL | 68 | 17.513 | -15.506 | 12.596 | 1.00 | 0.00 |
| ATOM | 1098 | 3HG2 | VAL | 68 | 18.340 | -14.110 | 11.864 | 1.00 | 0.00 |
| ATOM | 1099 | N    | GLU | 69 | 17.876 | -17.975 | 8.474  | 1.00 | 0.00 |
| ATOM | 1100 | CA   | GLU | 69 | 17.643 | -18.661 | 7.194  | 1.00 | 0.00 |
| ATOM | 1101 | C    | GLU | 69 | 16.306 | -18.385 | 6.520  | 1.00 | 0.00 |
| ATOM | 1102 | O    | GLU | 69 | 16.242 | -18.199 | 5.304  | 1.00 | 0.00 |
| ATOM | 1103 | CB   | GLU | 69 | 17.763 | -20.177 | 7.369  | 1.00 | 0.00 |
| ATOM | 1104 | CG   | GLU | 69 | 19.184 | -20.673 | 7.597  | 1.00 | 0.00 |
| ATOM | 1105 | CD   | GLU | 69 | 19.218 | -22.164 | 7.785  | 1.00 | 0.00 |
| ATOM | 1106 | OE1  | GLU | 69 | 18.173 | -22.769 | 7.774  | 1.00 | 0.00 |
| ATOM | 1107 | OE2  | GLU | 69 | 20.294 | -22.712 | 7.829  | 1.00 | 0.00 |
| ATOM | 1108 | H    | GLU | 69 | 17.968 | -18.542 | 9.305  | 1.00 | 0.00 |
| ATOM | 1109 | HA   | GLU | 69 | 18.381 | -18.336 | 6.460  | 1.00 | 0.00 |
| ATOM | 1110 | 1HB  | GLU | 69 | 17.143 | -20.449 | 8.223  | 1.00 | 0.00 |
| ATOM | 1111 | 2HB  | GLU | 69 | 17.359 | -20.635 | 6.466  | 1.00 | 0.00 |
| ATOM | 1112 | 1HG  | GLU | 69 | 19.874 | -20.392 | 6.802  | 1.00 | 0.00 |
| ATOM | 1113 | 2HG  | GLU | 69 | 19.481 | -20.183 | 8.524  | 1.00 | 0.00 |
| ATOM | 1114 | N    | GLU | 70 | 15.238 | -18.438 | 7.308  | 1.00 | 0.00 |
| ATOM | 1115 | CA   | GLU | 70 | 13.899 | -18.211 | 6.806  | 1.00 | 0.00 |
| ATOM | 1116 | C    | GLU | 70 | 13.075 | -17.559 | 7.908  | 1.00 | 0.00 |
| ATOM | 1117 | O    | GLU | 70 | 12.766 | -18.175 | 8.934  | 1.00 | 0.00 |
| ATOM | 1118 | CB   | GLU | 70 | 13.272 | -19.526 | 6.338  | 1.00 | 0.00 |
| ATOM | 1119 | CG   | GLU | 70 | 11.910 | -19.373 | 5.676  | 1.00 | 0.00 |
| ATOM | 1120 | CD   | GLU | 70 | 11.367 | -20.702 | 5.229  | 1.00 | 0.00 |
| ATOM | 1121 | OE1  | GLU | 70 | 12.031 | -21.691 | 5.430  | 1.00 | 0.00 |
| ATOM | 1122 | OE2  | GLU | 70 | 10.243 | -20.744 | 4.790  | 1.00 | 0.00 |
| ATOM | 1123 | H    | GLU | 70 | 15.364 | -18.643 | 8.289  | 1.00 | 0.00 |
| ATOM | 1124 | HA   | GLU | 70 | 13.933 | -17.522 | 5.962  | 1.00 | 0.00 |
| ATOM | 1125 | 1HB  | GLU | 70 | 13.969 | -19.978 | 5.632  | 1.00 | 0.00 |
| ATOM | 1126 | 2HB  | GLU | 70 | 13.179 | -20.165 | 7.216  | 1.00 | 0.00 |
| ATOM | 1127 | 1HG  | GLU | 70 | 11.174 | -18.875 | 6.307  | 1.00 | 0.00 |
| ATOM | 1128 | 2HG  | GLU | 70 | 12.117 | -18.754 | 4.804  | 1.00 | 0.00 |
| TER  |      |      |     |    |        |         |        |      |      |
| END  |      |      |     |    |        |         |        |      |      |
